# Supplementary material for: Talaromyces marneffei suppresses macrophage inflammation by regulating host alternative splicing
Source: PubMed Central journal article supplement (PMC10579421; doi:10.1038/s42003-023-05409-6), 2023-10-16
Supplement: 42003_2023_5409_MOESM1_ESM.pdf [file 42003_2023_5409_MOESM1_ESM.pdf]

**Supplementary material for *Talaromyces marneffe* suppresses macrophage inflammation by regulating host alternative splicing**

**Running title: *T. marneffe* regulates host AS**

Wudi Wei<sup>1,2#</sup>, Gang Wang<sup>1#</sup>, Hong Zhang<sup>2#</sup>, Xiuli Bao<sup>1#</sup>, Sanqi An<sup>1,2</sup>, Qiang Luo<sup>2</sup>, Jinhao He<sup>2</sup>, Lixiang Chen<sup>1</sup>, Chuanyi Ning<sup>2,3\*</sup>, Jingzhen Lai<sup>2,4</sup>, Zongxiang Yuan<sup>1</sup>, Rongfeng Chen<sup>1,2</sup>, Junjun Jiang<sup>1,2\*</sup>, Li Ye<sup>1,2\*</sup> and Hao Liang<sup>1,2,4\*</sup>

<sup>1</sup> Guangxi Key Laboratory of AIDS Prevention and Treatment, School of Public Health, Guangxi Medical University, Nanning 530021, Guangxi, China

<sup>2</sup> Guangxi-ASEAN Collaborative Innovation Center for Major Disease Prevention and Treatment, Life Sciences Institute, Guangxi Medical University, Nanning 530021, Guangxi, China

<sup>3</sup> Nursing College, Guangxi Medical University, Nanning 530021, Guangxi, China

<sup>4</sup> Guangxi Biobank, Life Sciences Institute, Guangxi Medical University, Nanning 530021, Guangxi, China

#Wudi Wei, Gang Wang, Hong Zhang and Xiuli Bao contributed equally to this paper.

\*Corresponding authors

Hao Liang, Email: lianghao@gxmu.edu.cn; Tel: 86-771-5323713; Fax: 86-771-5351624;

Li Ye, Email: yeli@gxmu.edu.cn; Tel: 86-771-5334215; Fax: 86-771-5351624

Junjun Jiang, Email: jiangjunjun@gxmu.edu.cn; Tel: 86-771-5334215; Fax: 86-771-5351624

**Keywords:** *Talaromyces marneffe*, macrophages, NCOR2-013, TUT1, alternative splicing

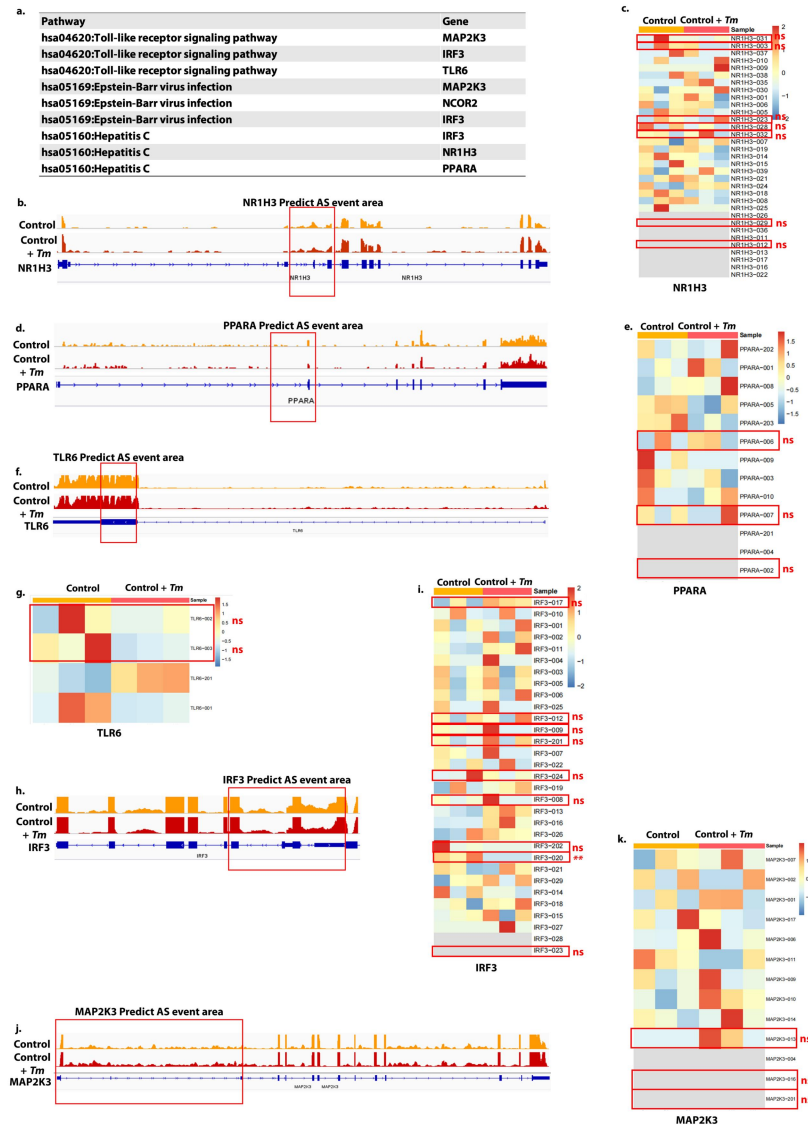

**Supplementary Figure 1. The heatmaps and track plots of *NR1H3*, *PPARA*, *IRF3*, *MAP2K3* and *TLR6* transcripts.** The human THP-1 macrophages were infected with *T. marneffei* conidia (MOI = 10) for 24 h. (a) Summary of the abundance of 3 KEGG pathways according to ES-type AS genes, with  $FDR < 0.05$  and  $|Lnclevel| > 0.5$  were exhibited. (b, d, f, h, j) Genome tracks plots show the reads from *NR1H3*, *PPARA*, *TLR6*, *IRF3*, *MAP2K3* genes and predicted AS areas by rMATS in *T. marneffei*-infected or uninfected macrophages at 24 h post infection. Gene coding regions and annotations are indicated in blue at the bottom. The exons and introns are represented by rectangles and straight lines, respectively. The red box represents the site of AS predicted. (c, e, g, k, i) The heatmap exhibits the expression levels of different transcripts of *NR1H3*, *PPARA*, *TLR6*, *IRF3*, *MAP2K3*. The red boxes represent the transcripts that are produced by predicted AS events and are known to exist. DESeq2 package was used to determine significance, denoted by \* ( $P_{adj} < 0.05$ ), \*\* ( $P_{adj} < 0.01$ ), and ns (not significant). MOI, multiplicity of infection; *Tm*, *T. marneffei*.

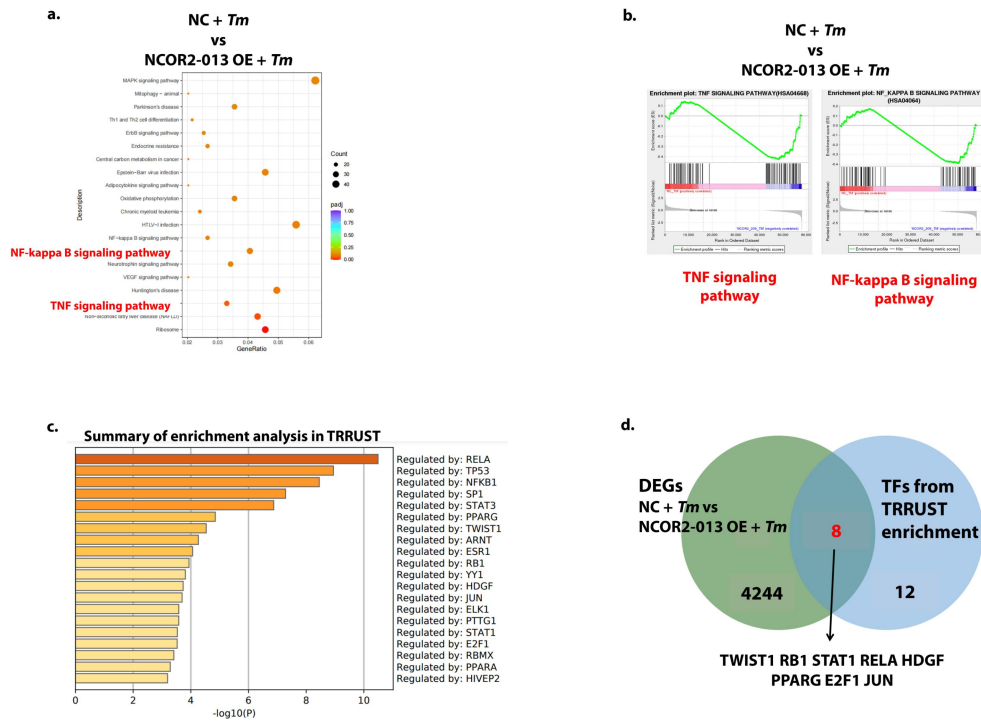

**Supplementary Figure 2. Transcriptome profiles of *T. marneffei*-infected NCRO2-013 overexpressing THP-1 macrophages.** The NCRO2-013 overexpressing THP-1 macrophages and control cells were infected with *T. marneffei* conidia at a MOI of 10 for 24 h. (a-b) KEGG pathway (a) and GSEA (b) enrichment analysis of DEGs ( NCRO2-013 overexpressing THP-1 macrophages vs. control cells). (c)TRRUST analysis was performed to predict the set of transcription factors regulating DEGs. (d) The 20 transcription factors predicted by TRRUST analysis were intersected with DEGs, and 8 transcription factors were obtained, including TWIST1, RB1, STAT1, RELA, HDGF, PPARG, E2F1 and JUN, which may play a role in the regulation of *T. marneffei* infection by NCRO2-013. NC, negative control; NCOR2-013 OE, NCRO2-013 overexpression; TFs, transcription factors; *Tm*, *T. marneffei*.

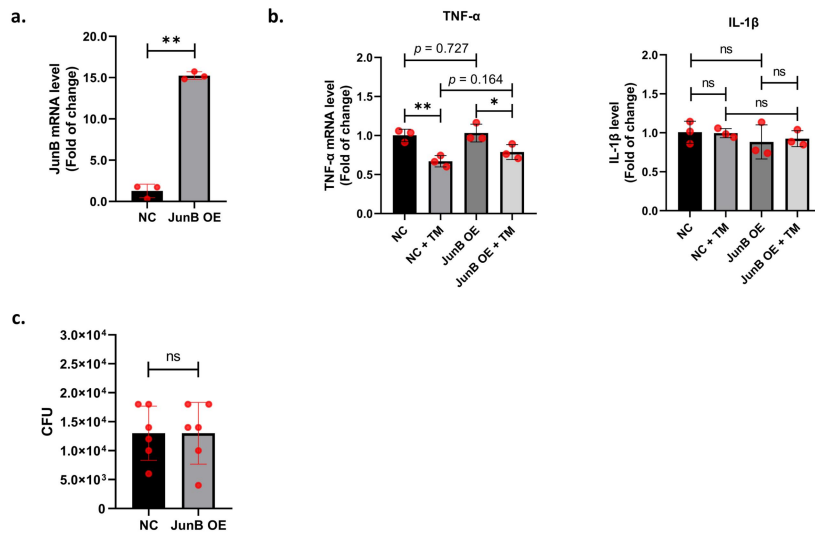

**Supplementary Figure 3. JunB overexpression effects on *T. marneffei* infection in THP-1 Macrophages.** (a) JunB overexpression in THP-1 macrophages was confirmed by RT-qPCR (n = 3 biological replicates, data are presented as mean values  $\pm$  SD). (b, c) The JunB overexpressing THP-1 macrophages and control cells were infected with *T. marneffei* conidia (MOI = 10) for 24 h. The expression of *TNF- $\alpha$*  and *IL-1 $\beta$*  was detected by RT-qPCR (b) (n = 3 biological replicates, data are presented as mean values  $\pm$  SD). *T. marneffei* CFUs were detected in JunB overexpressing THP-1 macrophages and control cells (c) (n = 6 biological replicates, data are presented as mean values  $\pm$  SD). Two-tailed Student's *t*-test was used to determine significance, denoted by \* ( $P < 0.05$ ), \*\* ( $P < 0.01$ ), and ns (not significant). MOI, multiplicity of infection; NC, negative control; JunB OE, JunB overexpression; *Tm*, *T. marneffei*.

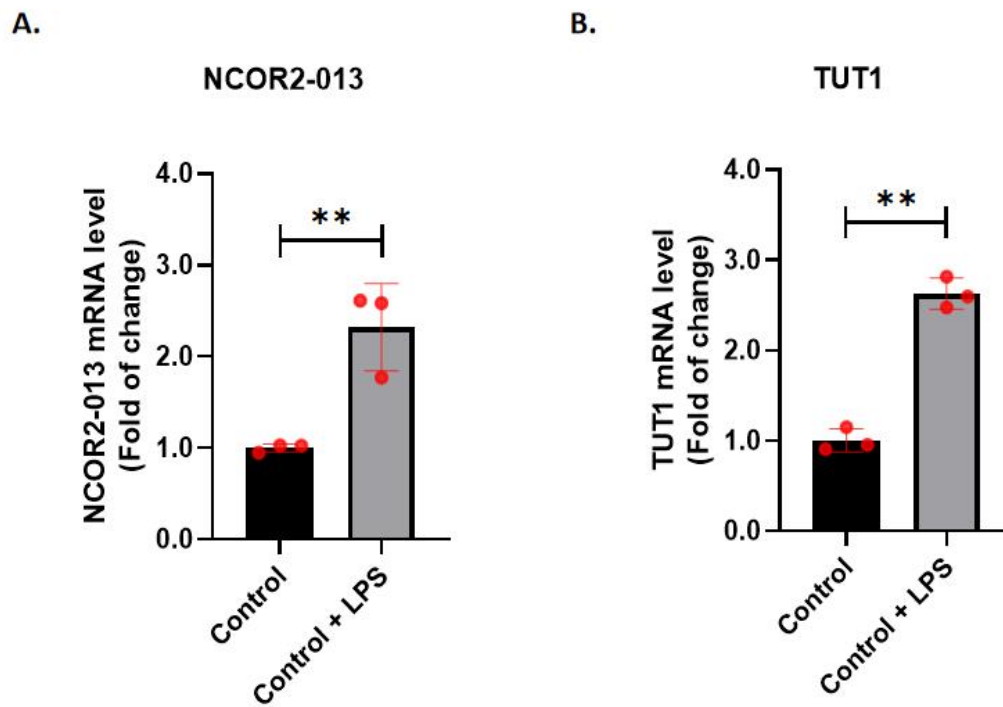

**Supplementary Figure 4.** THP-1 macrophages were stimulated with LPS (500 ng/mL) for 24 h. The expression of *NCOR2-013* (A) and *TUT1* (B) was detected by RT-qPCR. All data are shown as mean  $\pm$  SD from three biological replicates ( $n = 3$ ). Two-tailed Student's *t*-test was used to determine significance, denoted by \* ( $P < 0.05$ ), \*\* ( $P < 0.01$ ), and ns (not significant).

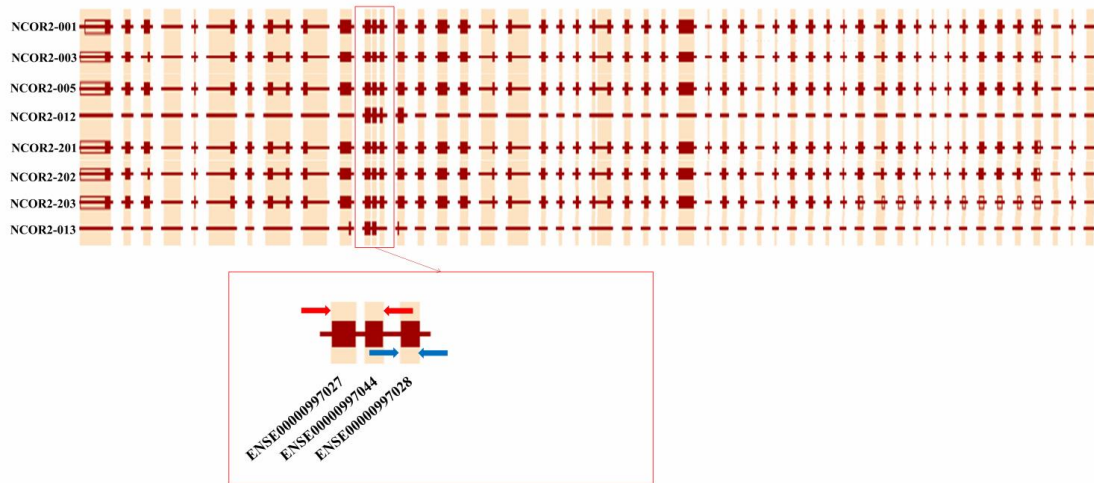

**Supplementary Figure 5 . Primer design principles for calculating *NCOR2-013* expression levels.** Exons 10 (ENSE00000997027) and 11 (ENSE00000997044) are all included among transcripts of *NCOR2*, which contain exon 12 (ENSE00000997028), while *NCOR2-013* transcript contains only exons 10 and 11, but not exon 12. Therefore, two pairs of primers were designed based on the combined sequence of exons 10 and 11 and the sequence of exon 12. The expression levels of these two pairs of primers were detected by qPCR. Finally, the expression level of exon 12 was subtracted from the expression level of exon 10/11 to indirectly calculate the expression level of *NCOR2-013* transcript.

**Supplementary Figure 6**  
**Unedited/uncropped western blot gels**

**Figure 2G**

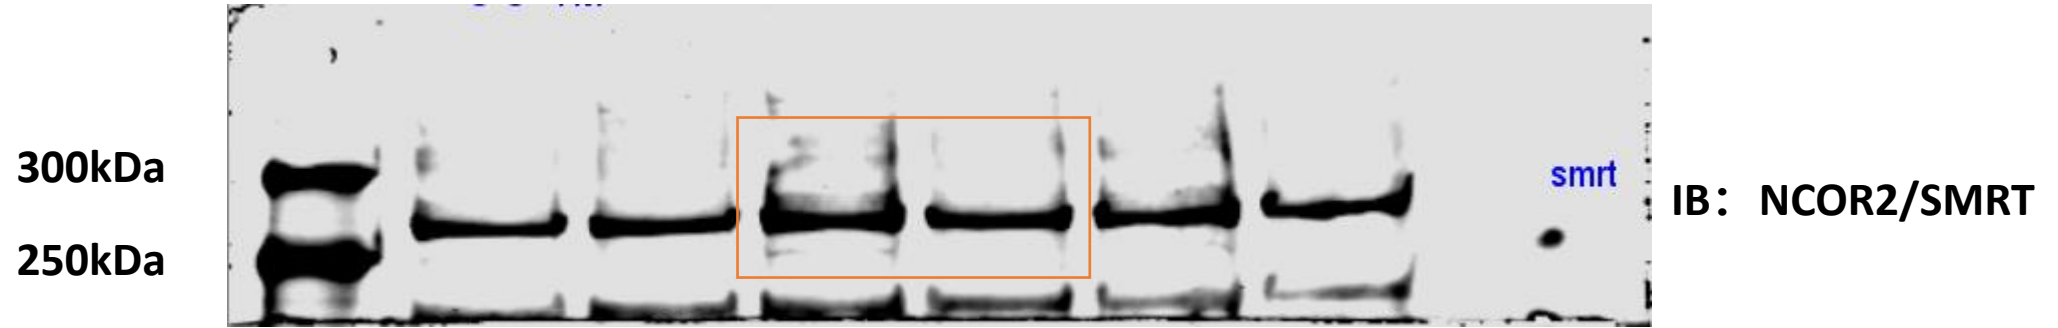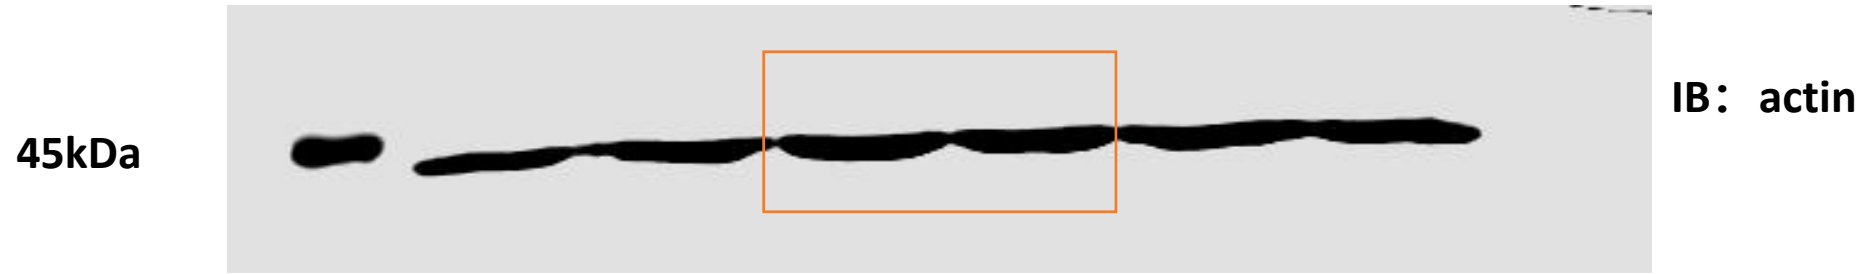

kDa

300

250

200

160

130

100

72

45

25

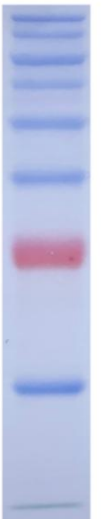



**Figure 3C**

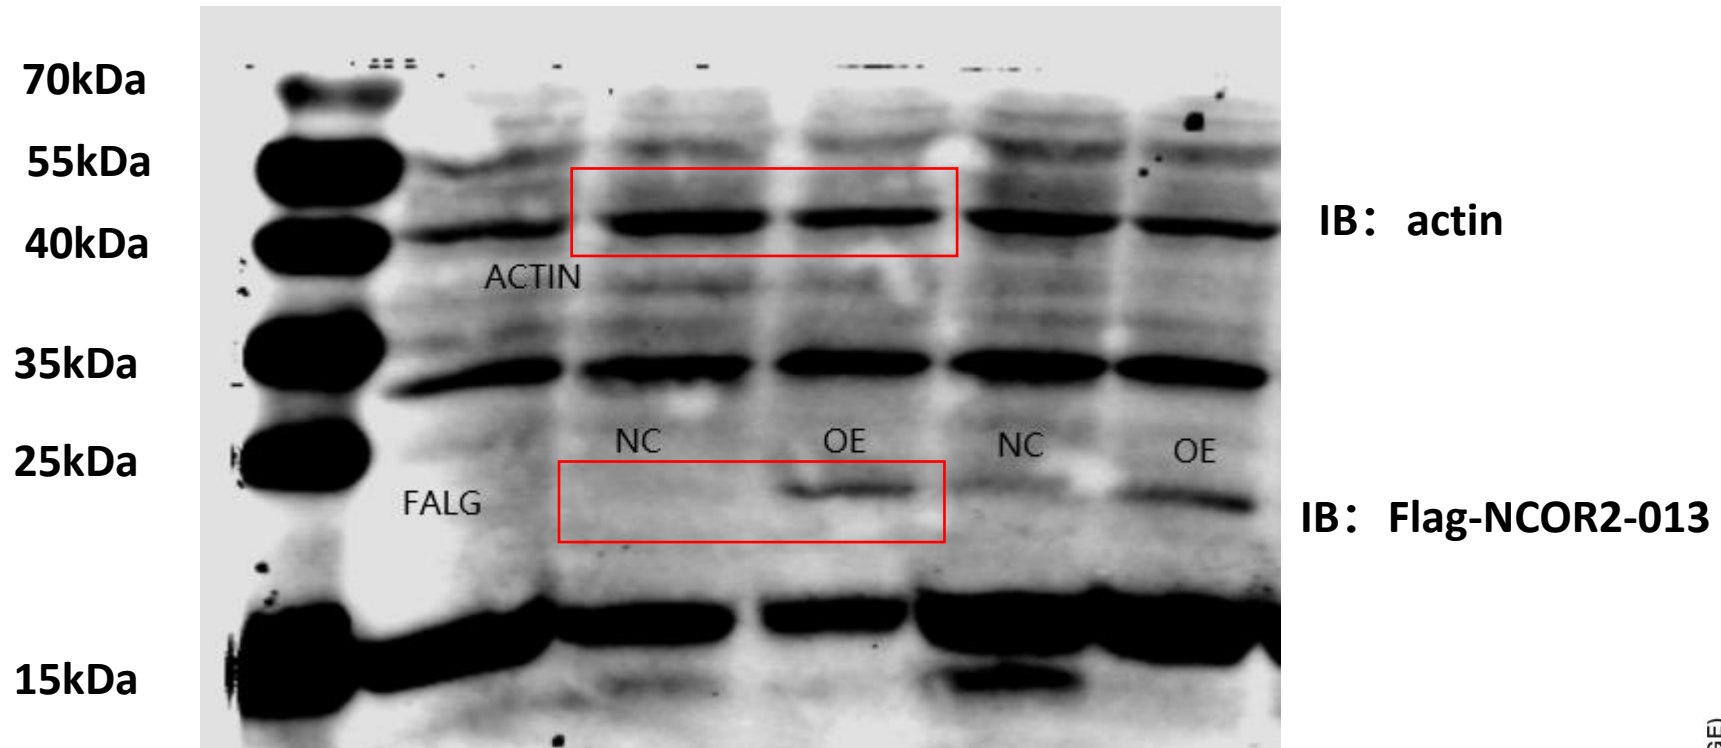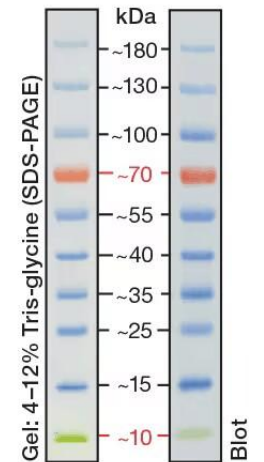

**Figure 3E Cytoplasm**

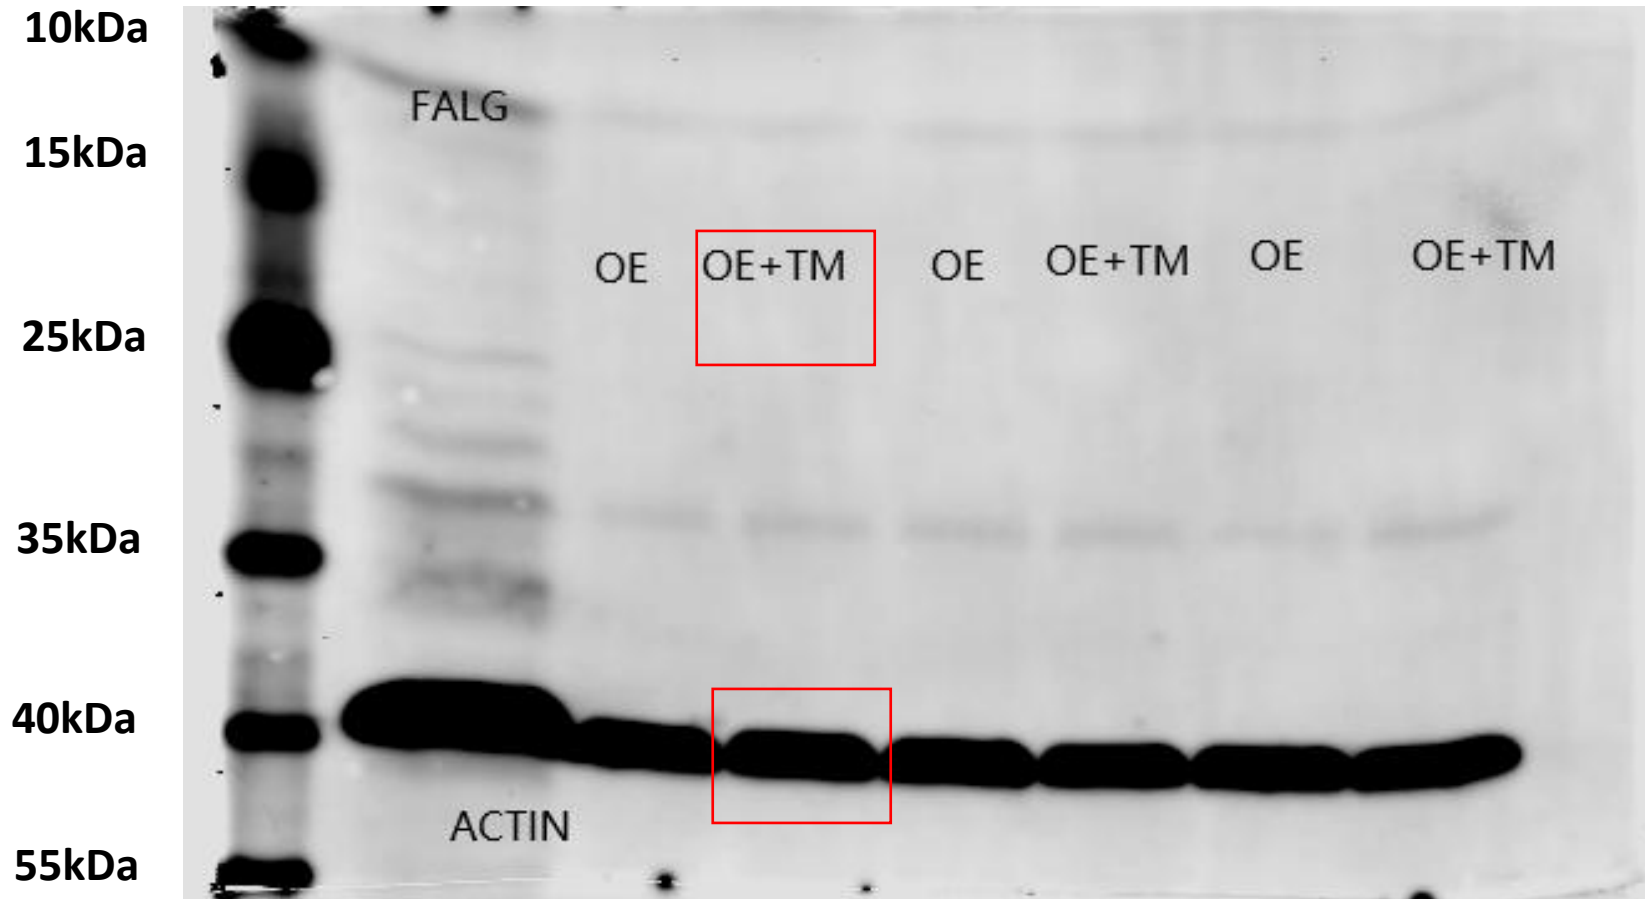

**IB: Flag-NCOR2-013**

**IB: actin**



**Figure 3E Nucleus**

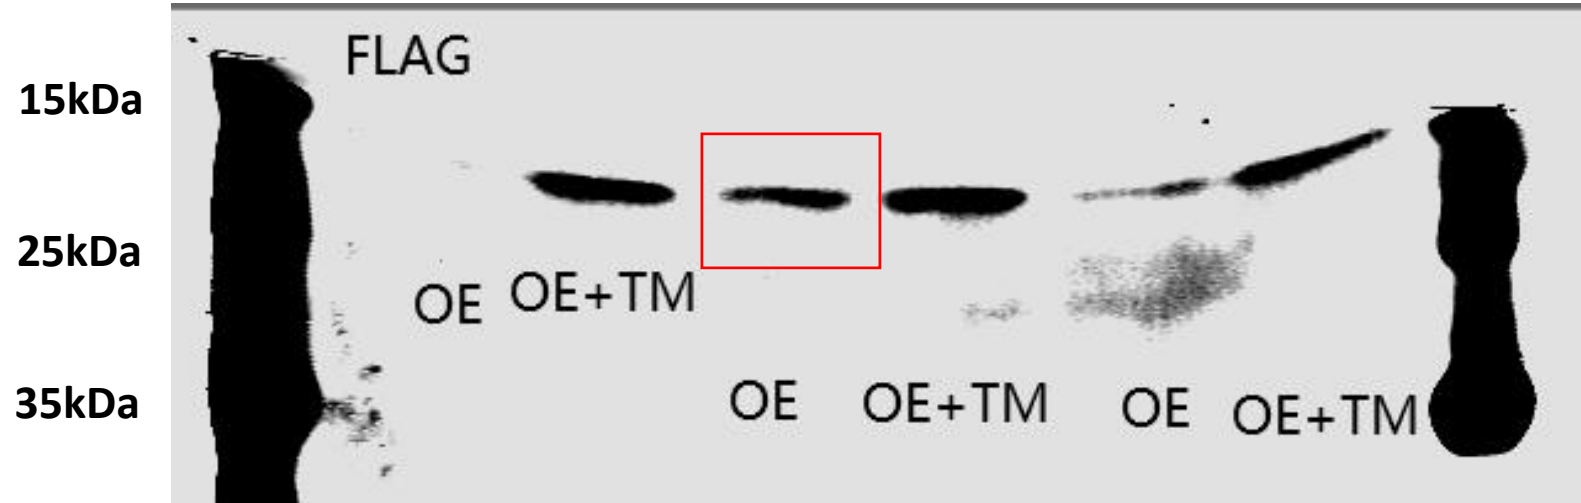

**IB: Flag-NCOR2-013**

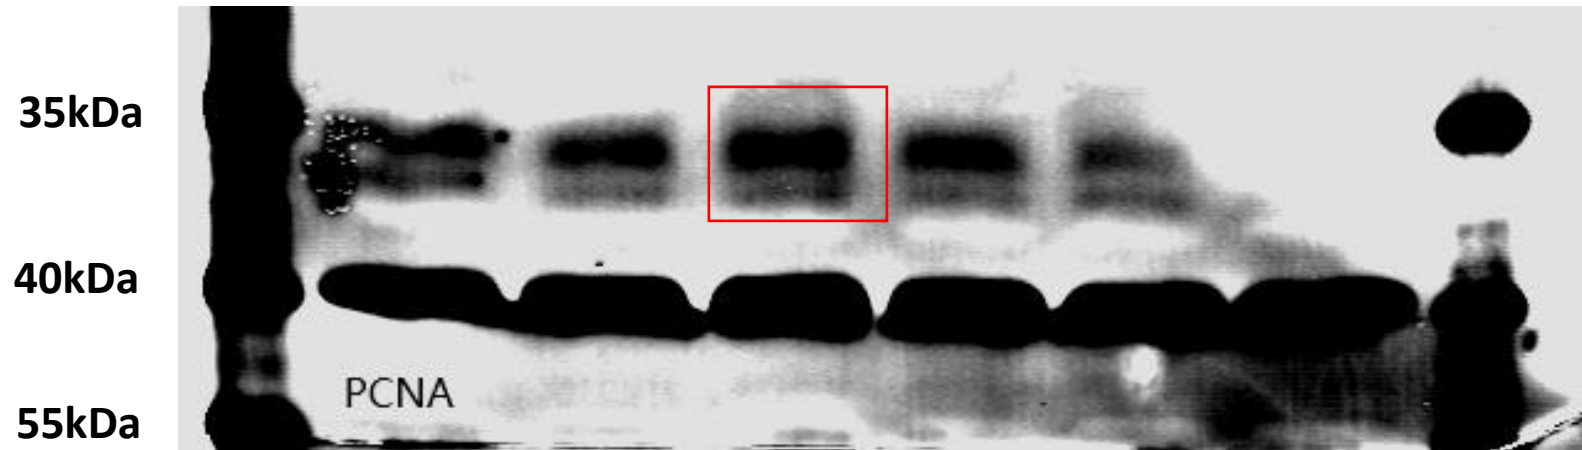

**IB: PCNA**

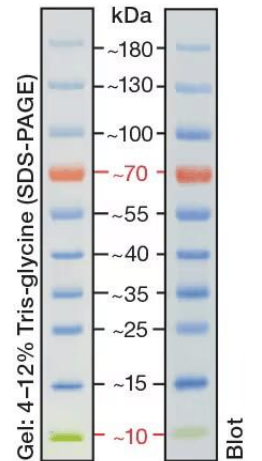

**Figure 4B IP: Flag, IB: Flag-NCOR2-013, IB: JunB**

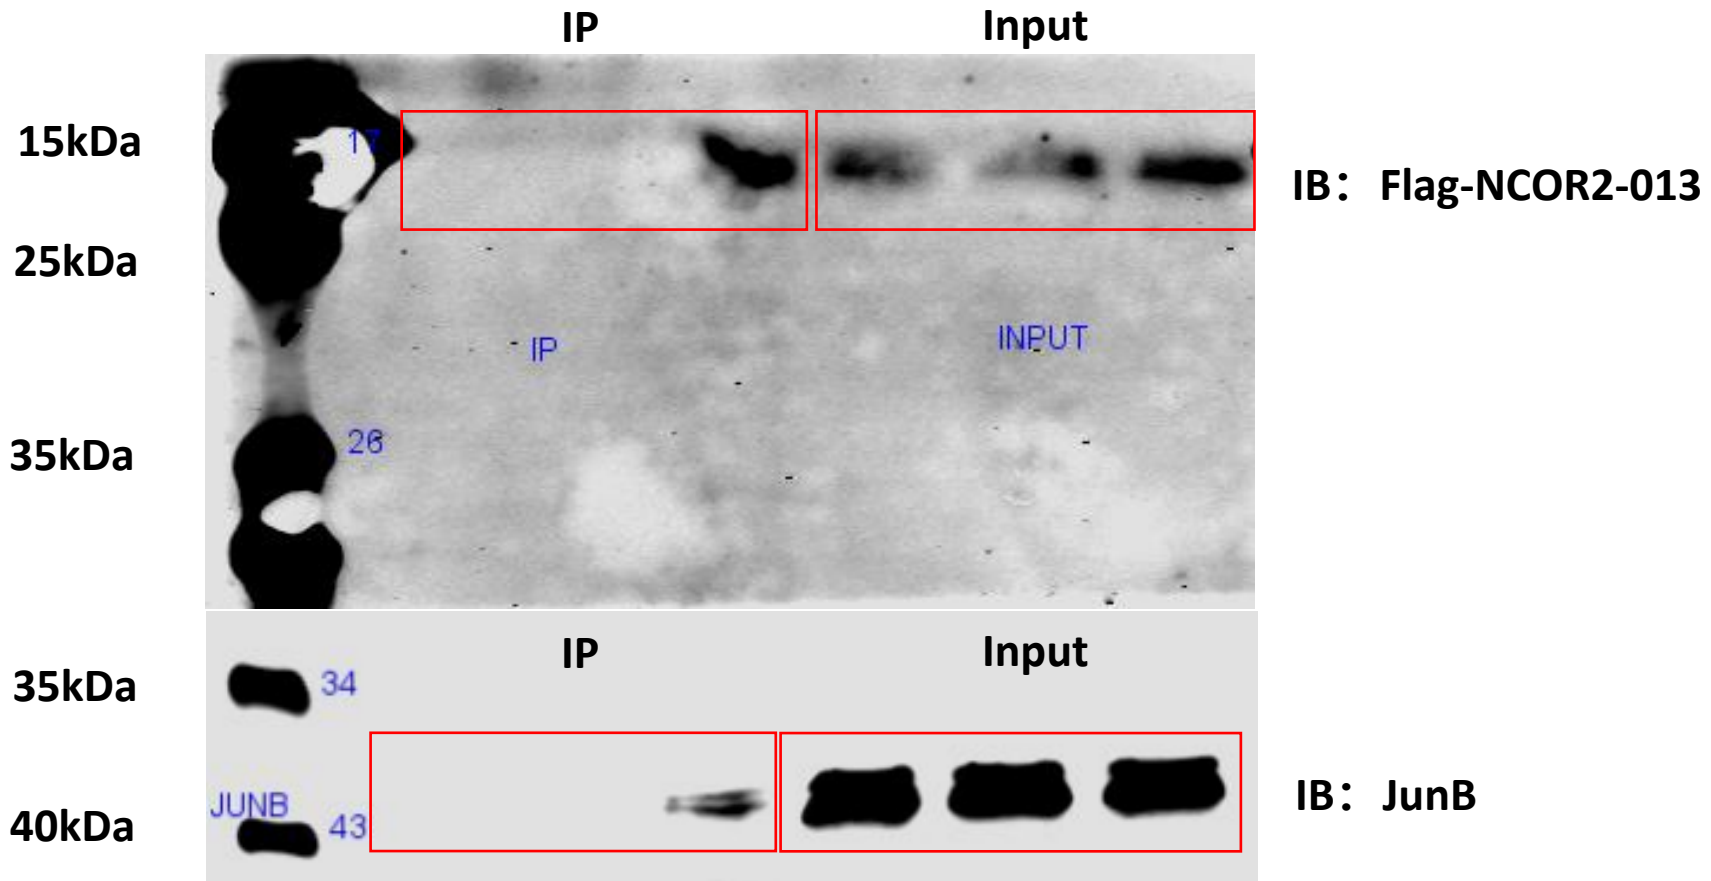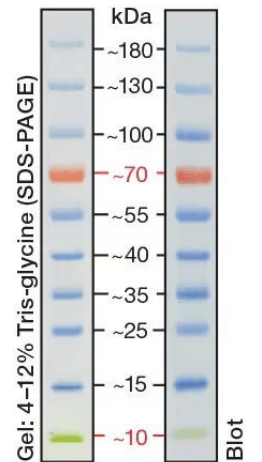

**Figure 4B IP: Flag IB: TBL1XR1/TBLR1, IB: HDAC3**

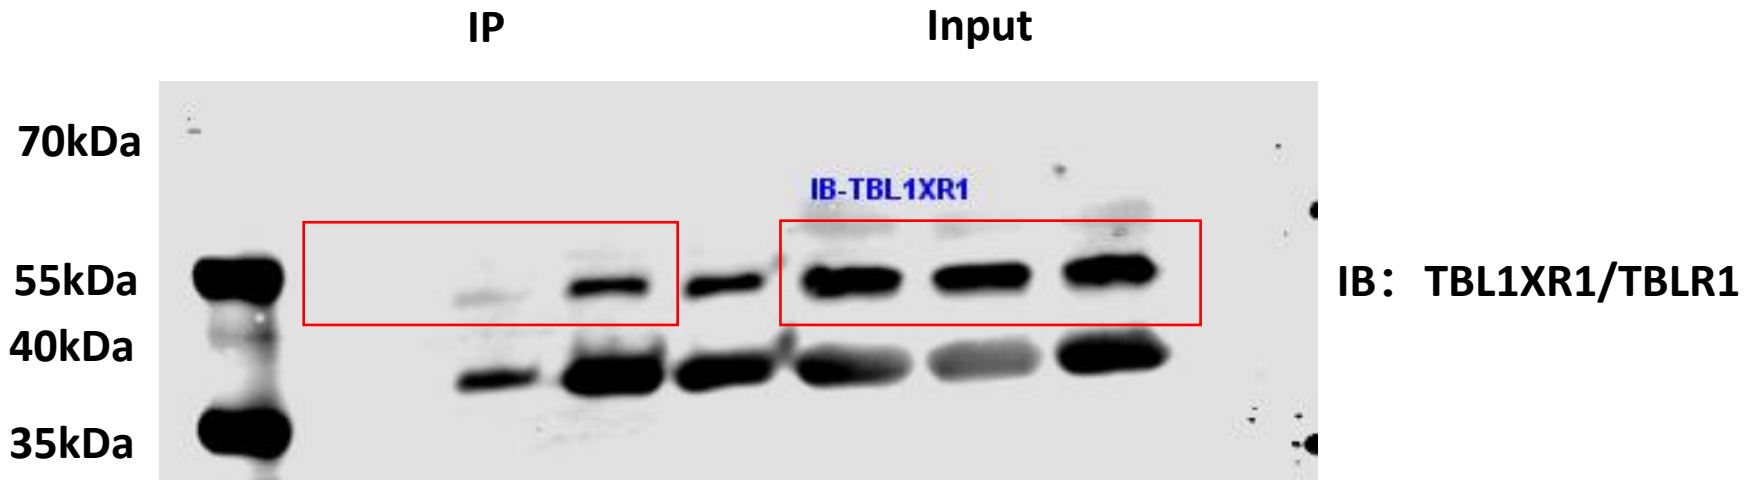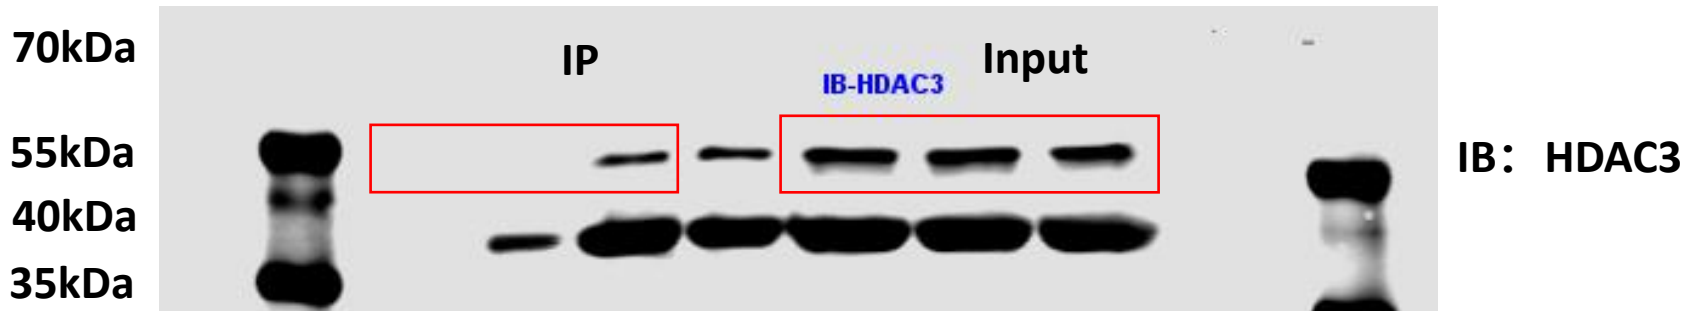

**Figure 4B IP: Flag IB: NCOR2/SMRT**

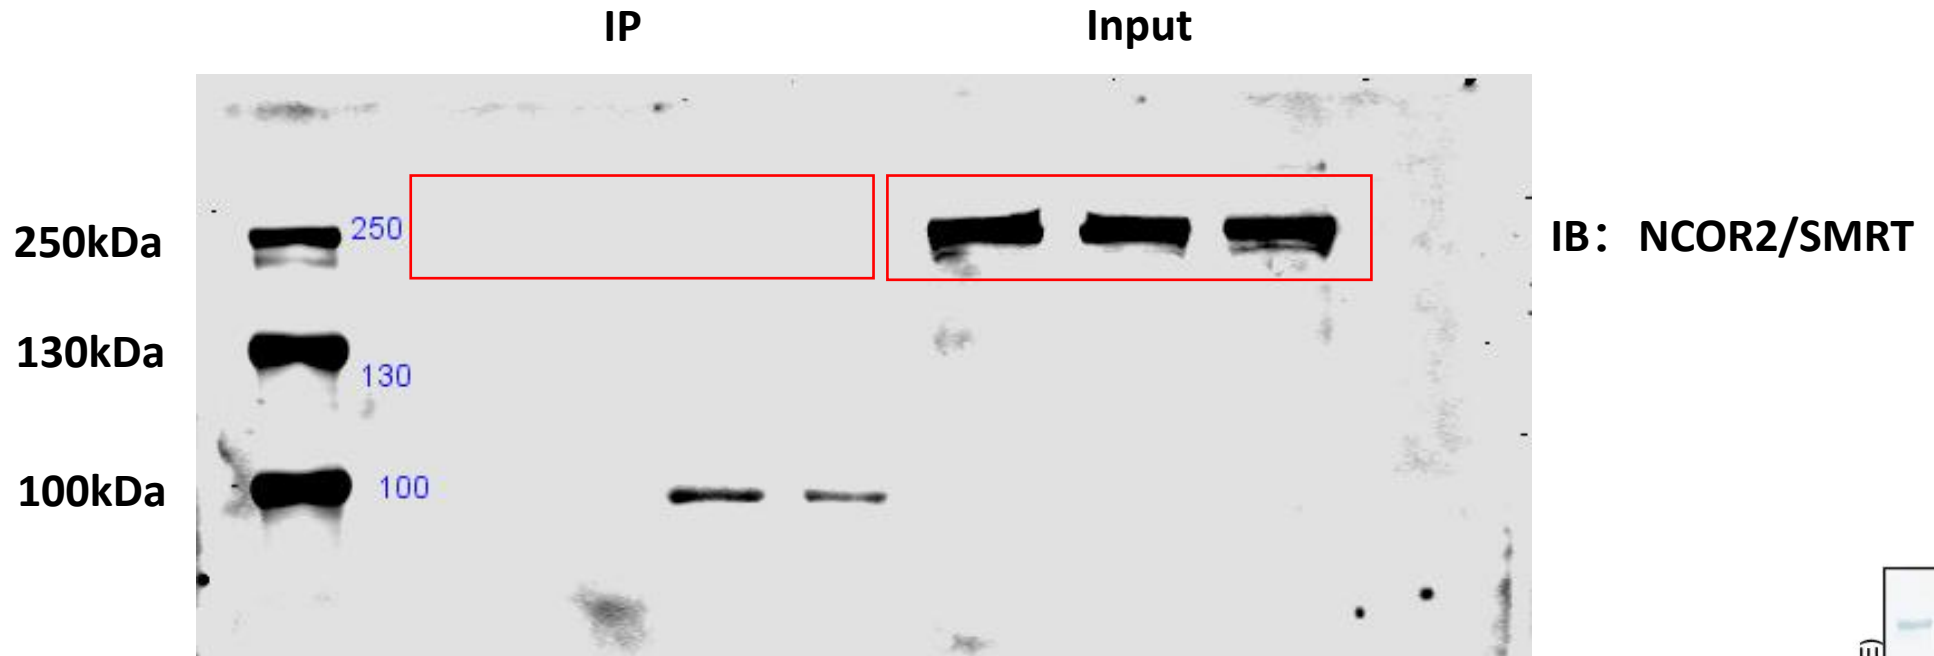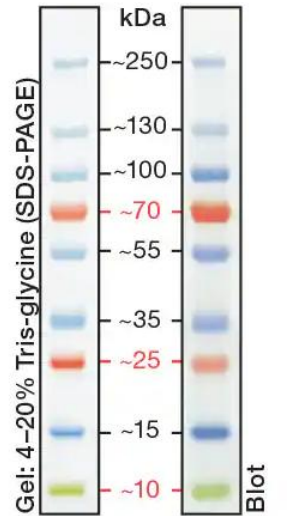

**Figure 4C IP: JunB, IB: Flag-NCOR2-013, IB: JunB**

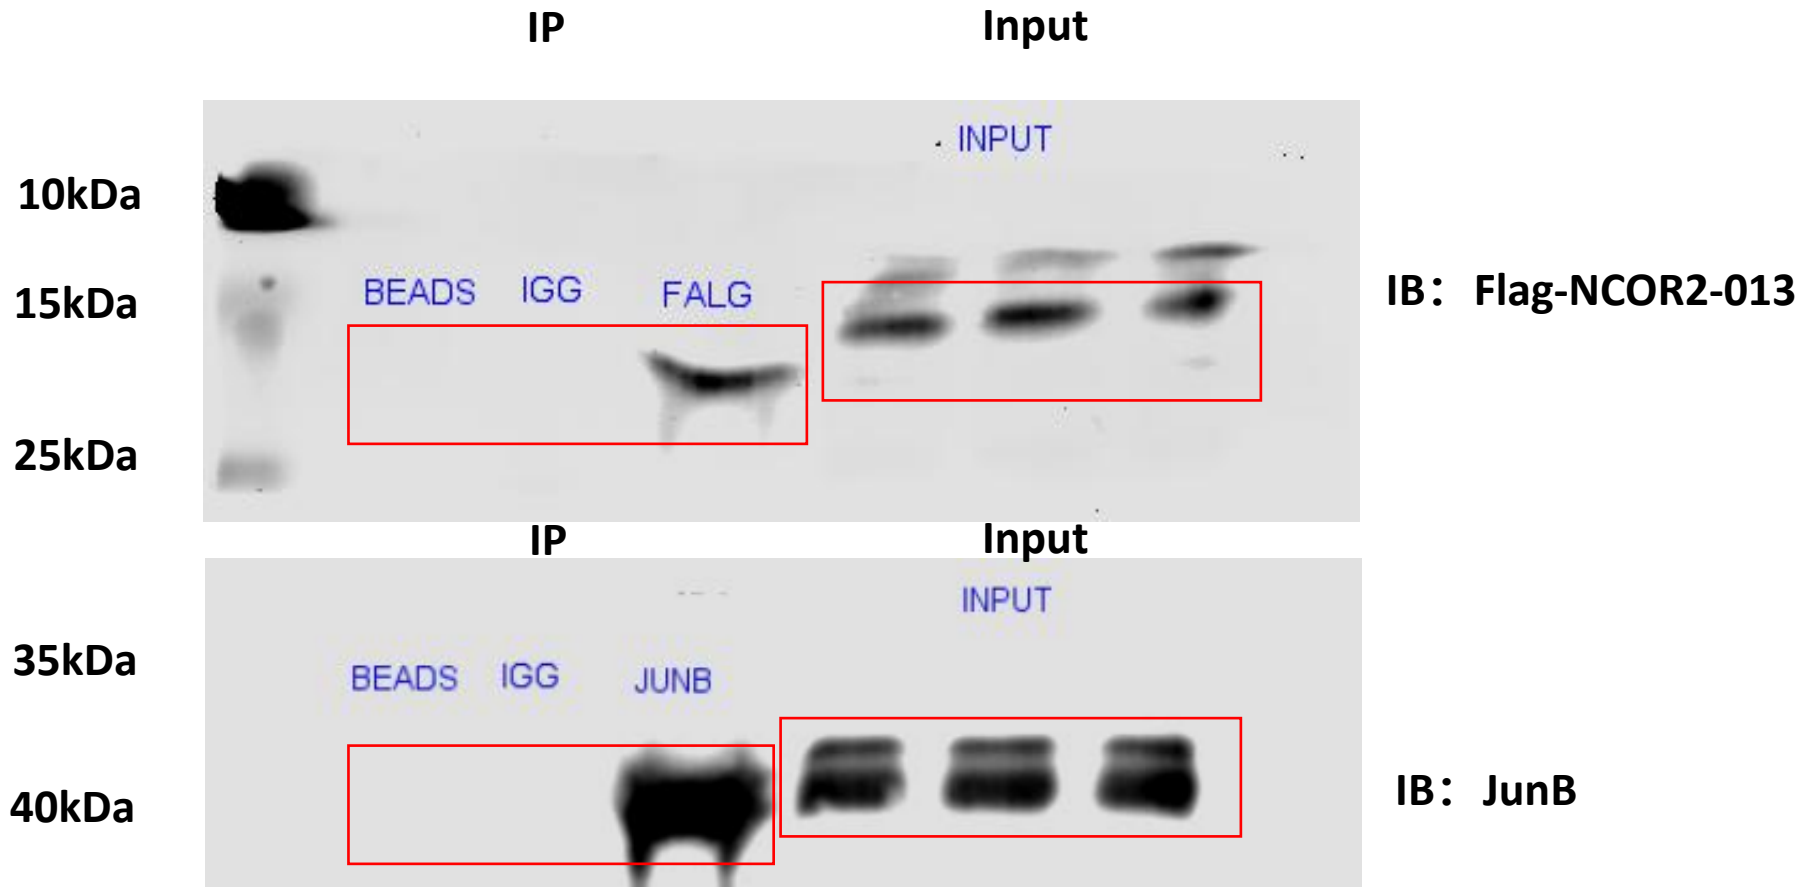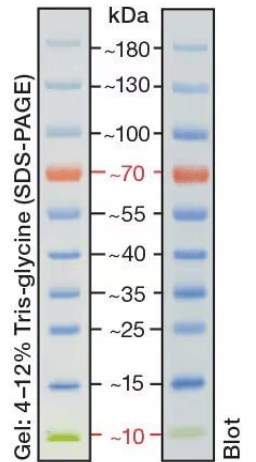

**Figure 4C IP: JunB IB: TBL1XR1/TBLR1, IB: HDAC3**

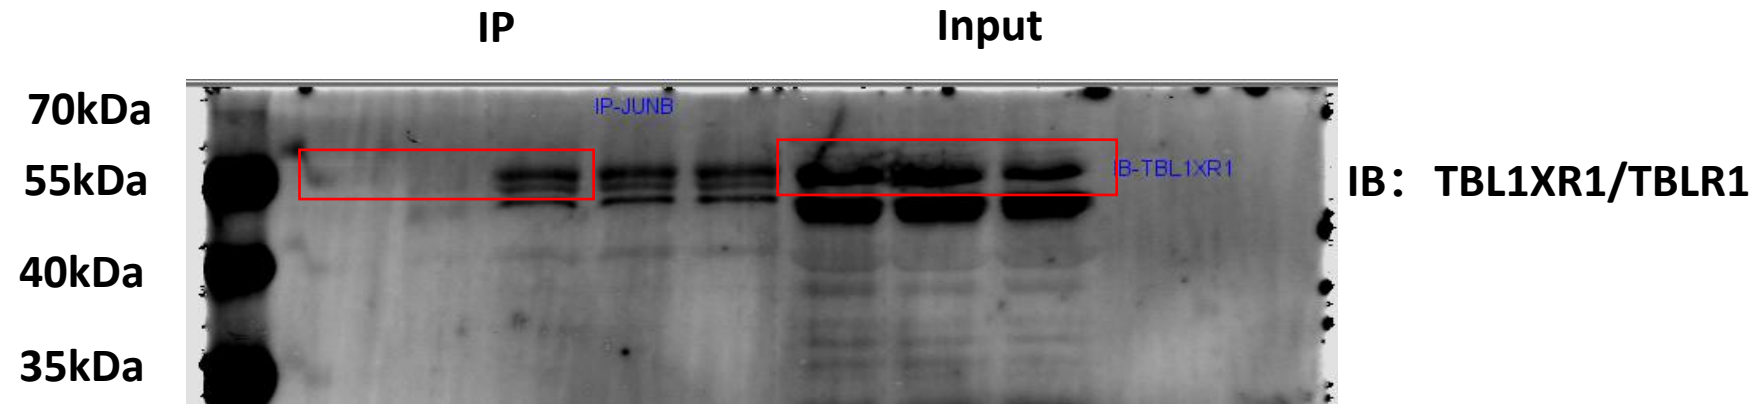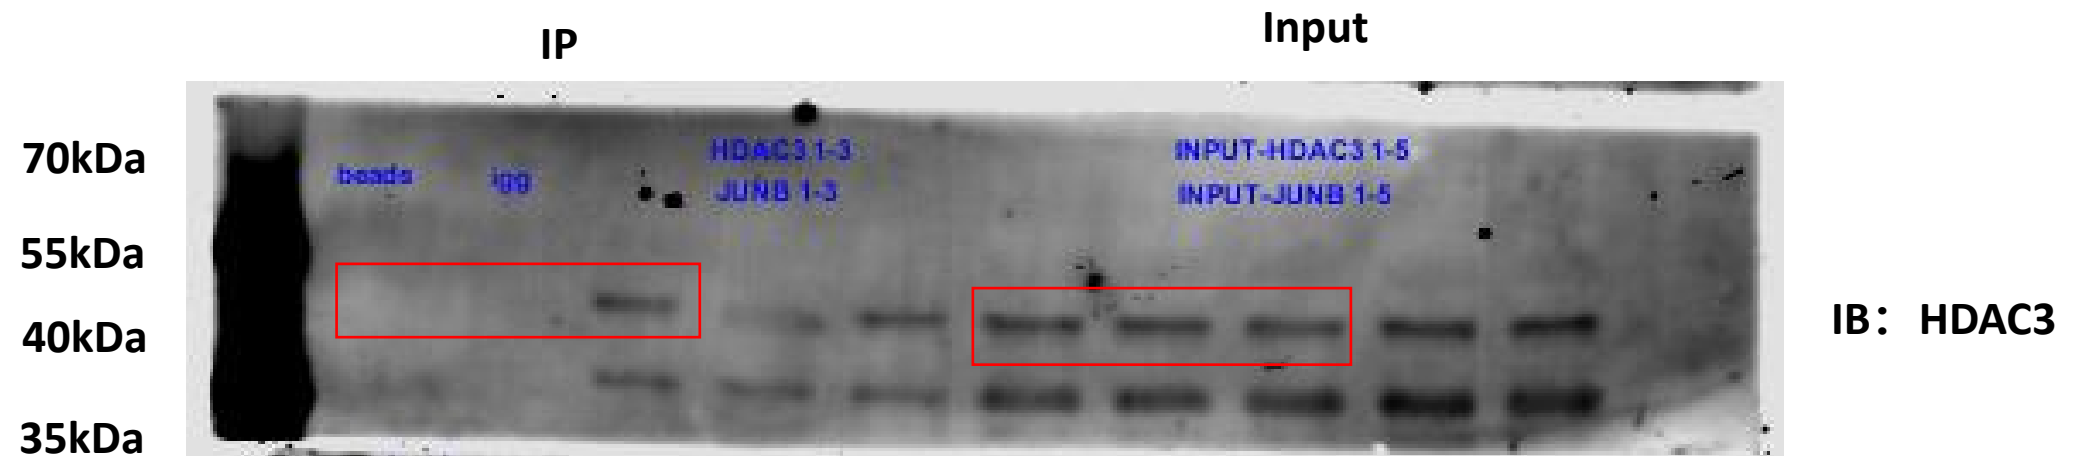



**Figure 4C IP: Flag IB: NCOR2/SMRT**

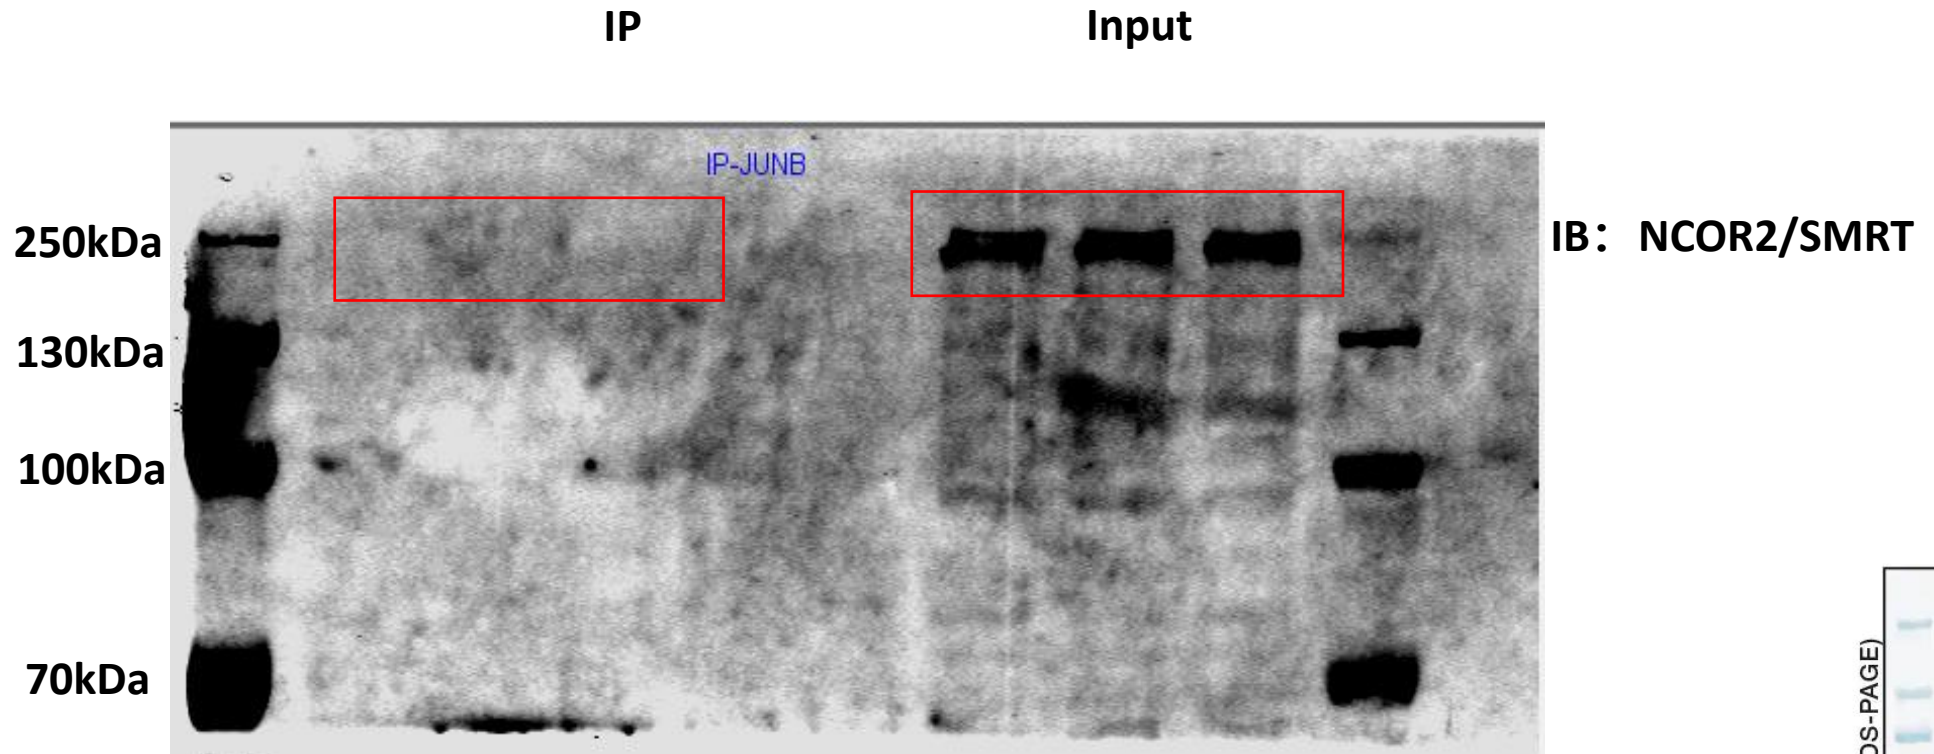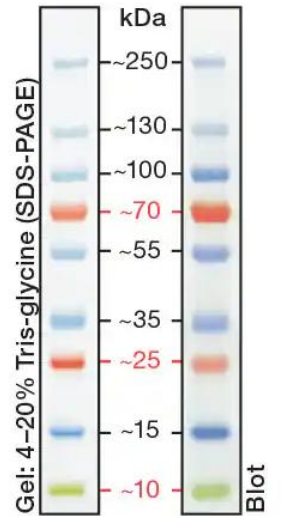

**Figure 4D** IP: TBL1XR1/TBLR1, IB: Flag-NCOR2-013, IB: TBL1XR1/TBLR1

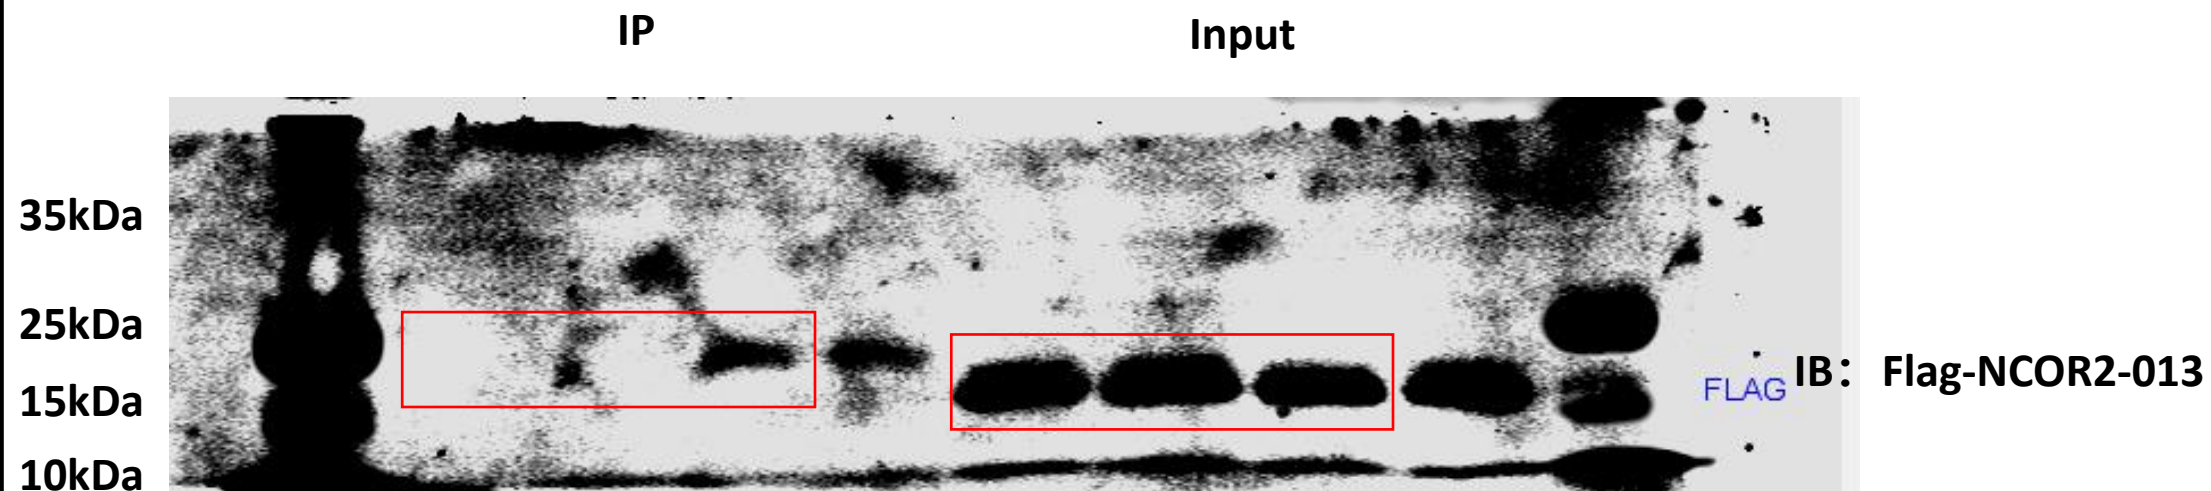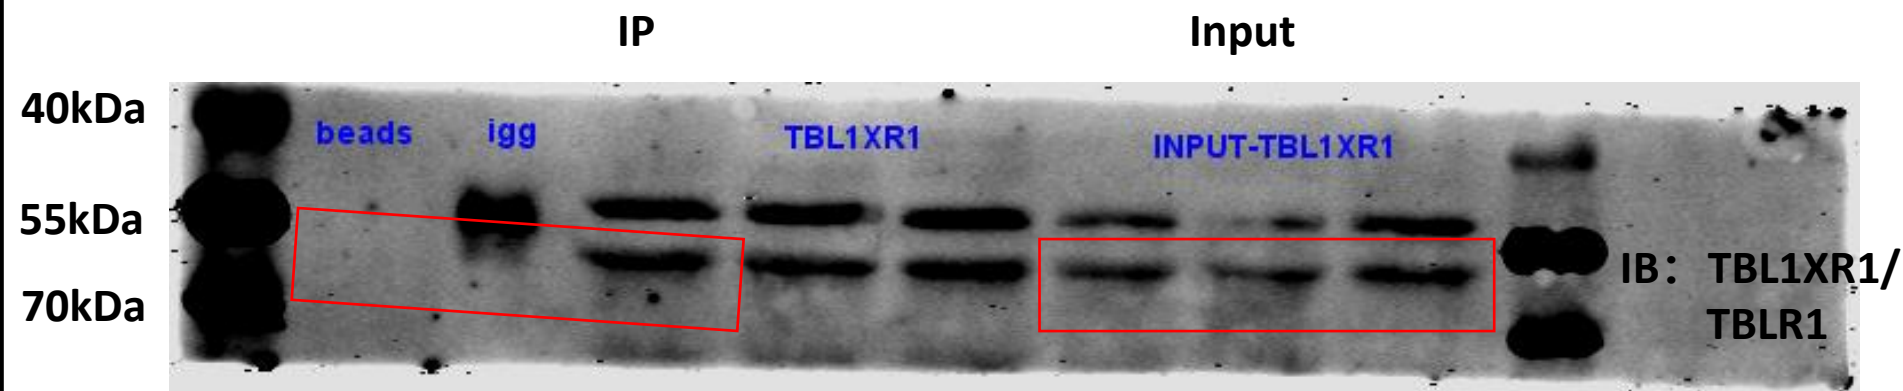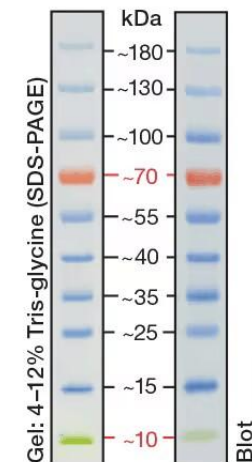

**Figure 4D** IP: TBL1XR1/TBLR1, IB: JunB, IB: HDAC3

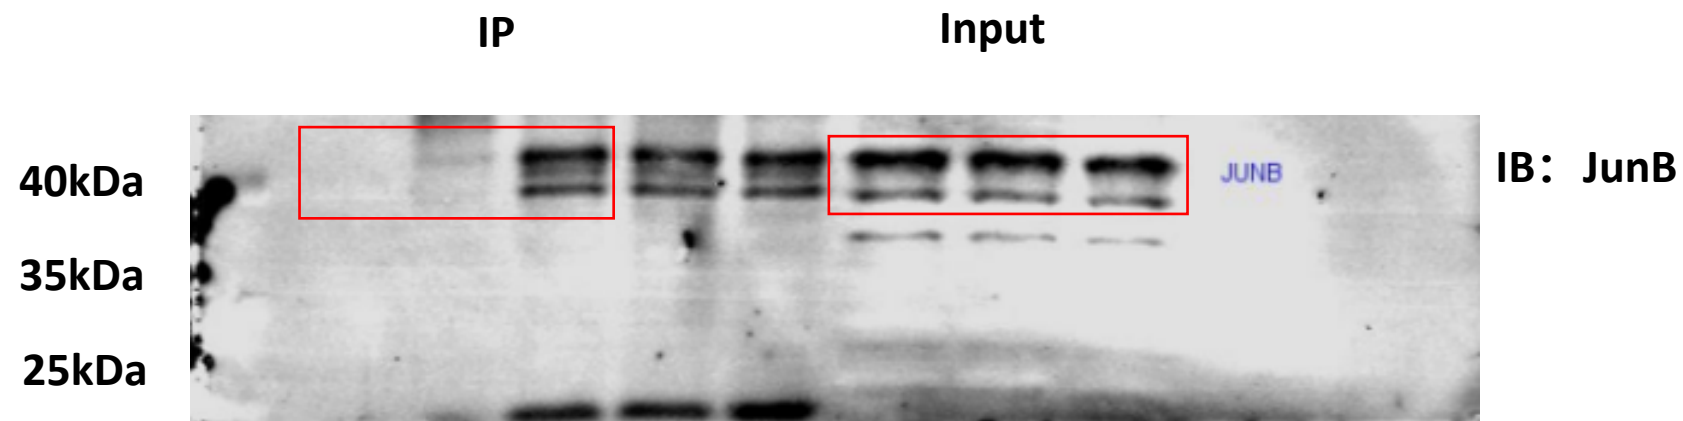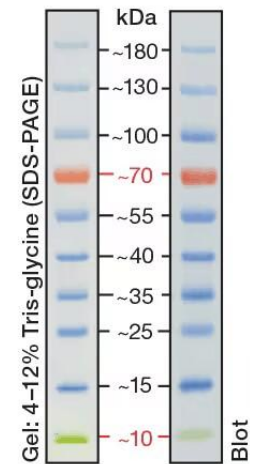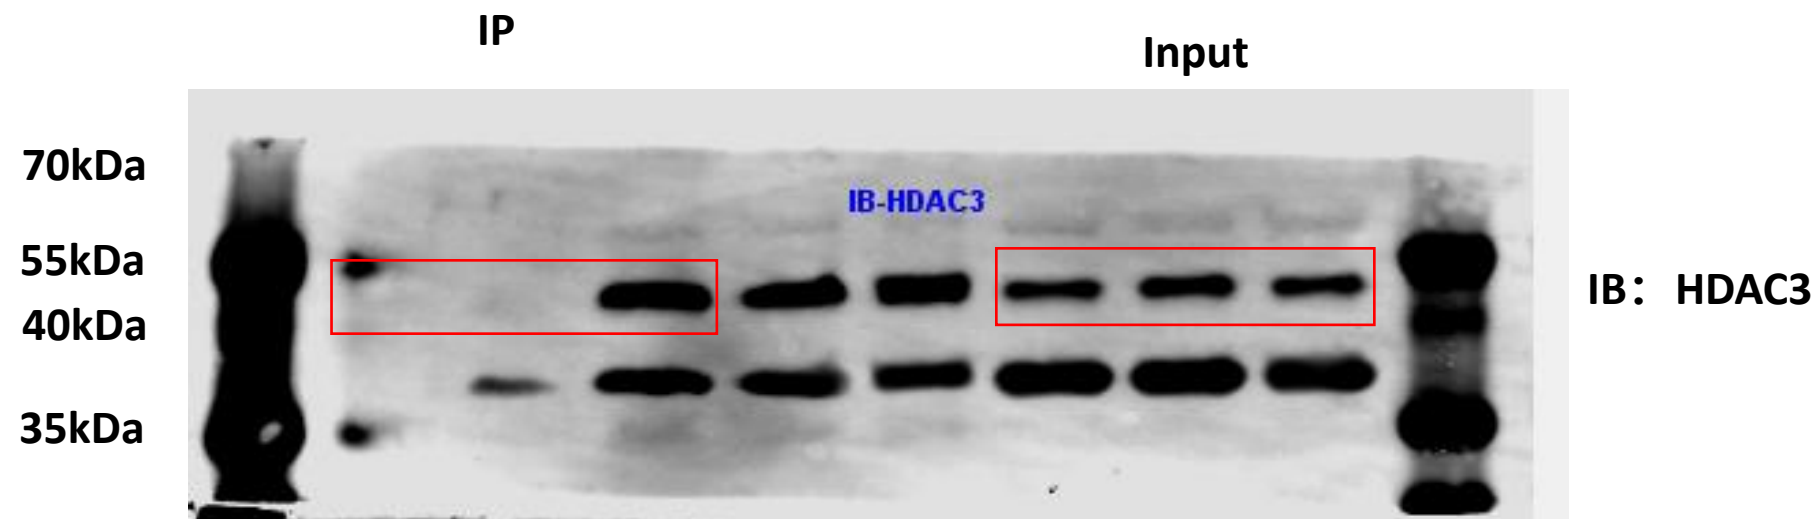

**Figure 4D IP: TBL1XR1/TBLR1, IB: NCOR2/SMRT**

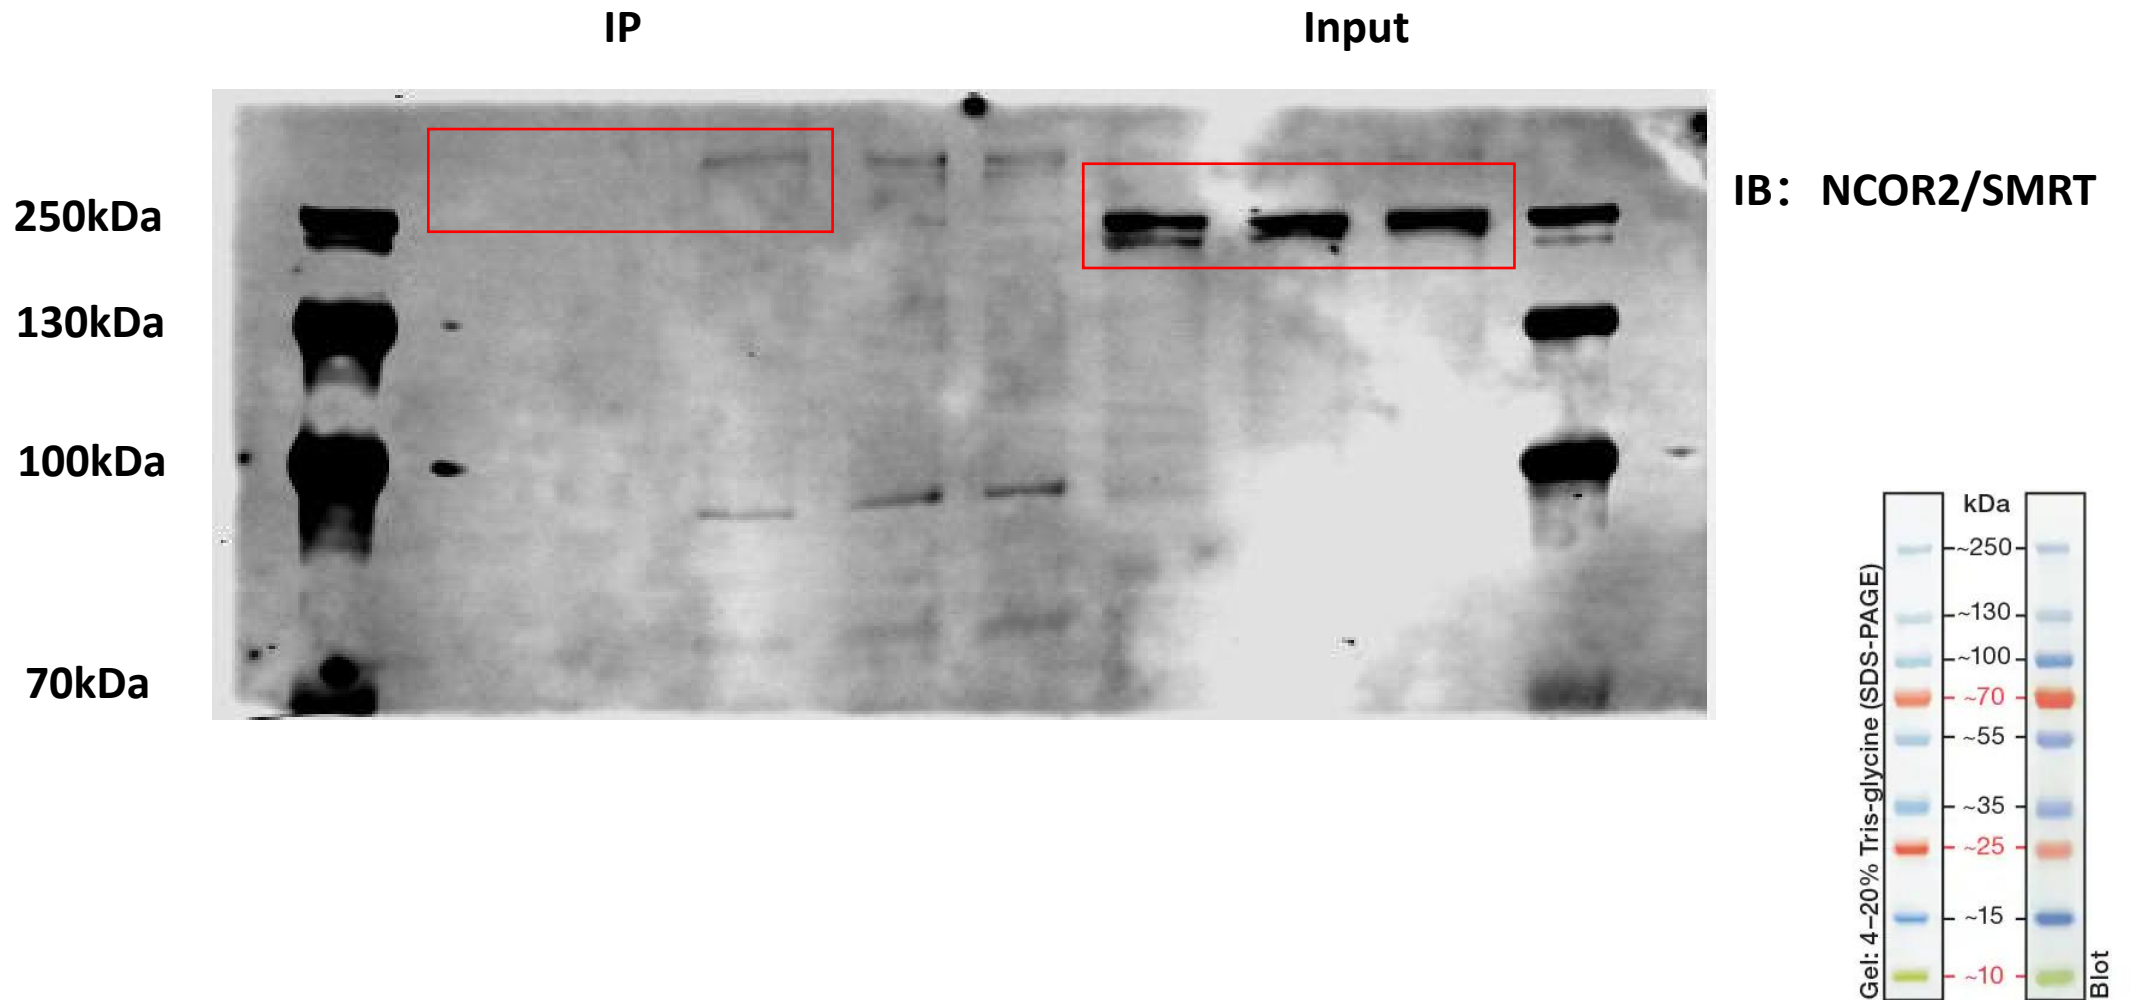

**Figure 4E** IP: HDAC3, IB: Flag-NCOR2-013, IB: HDAC3

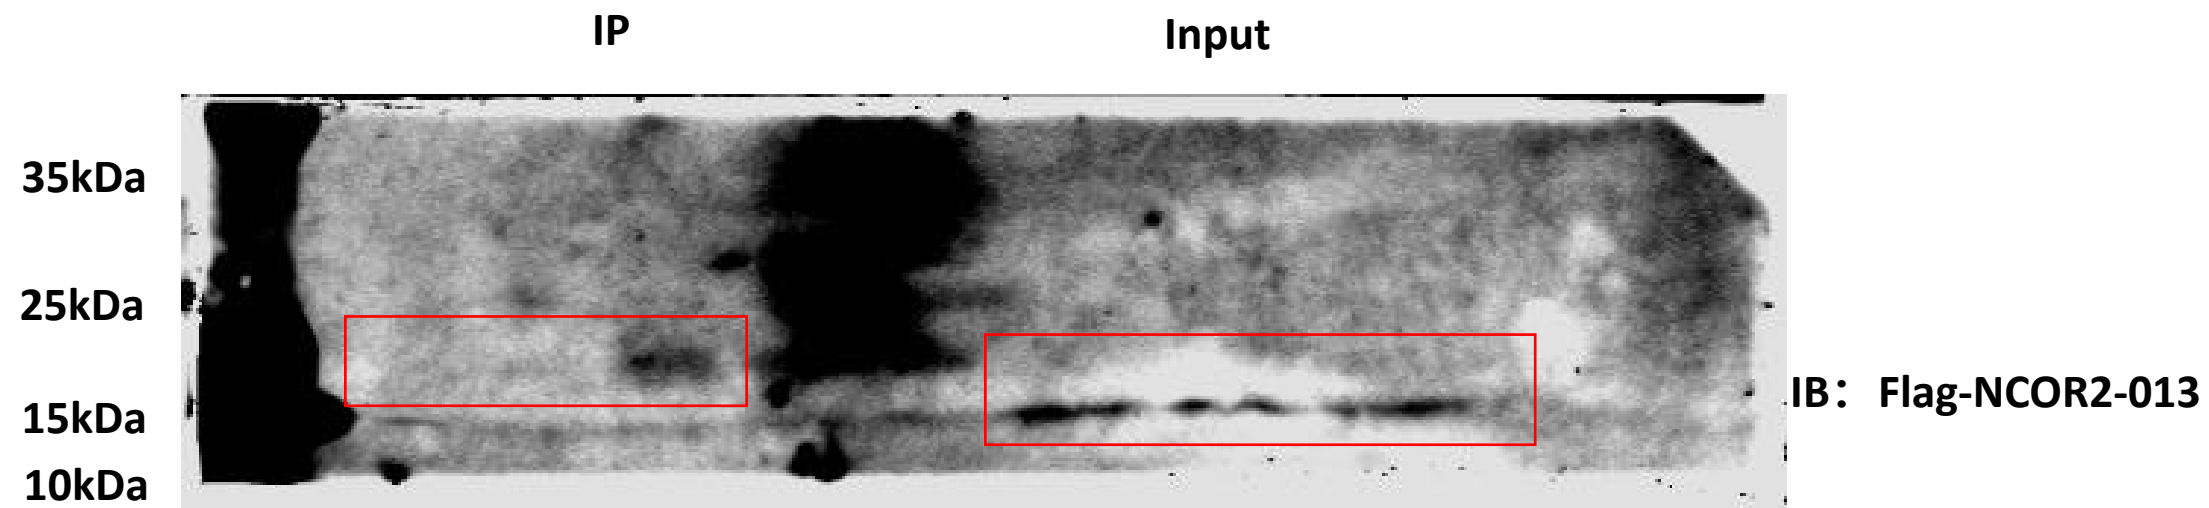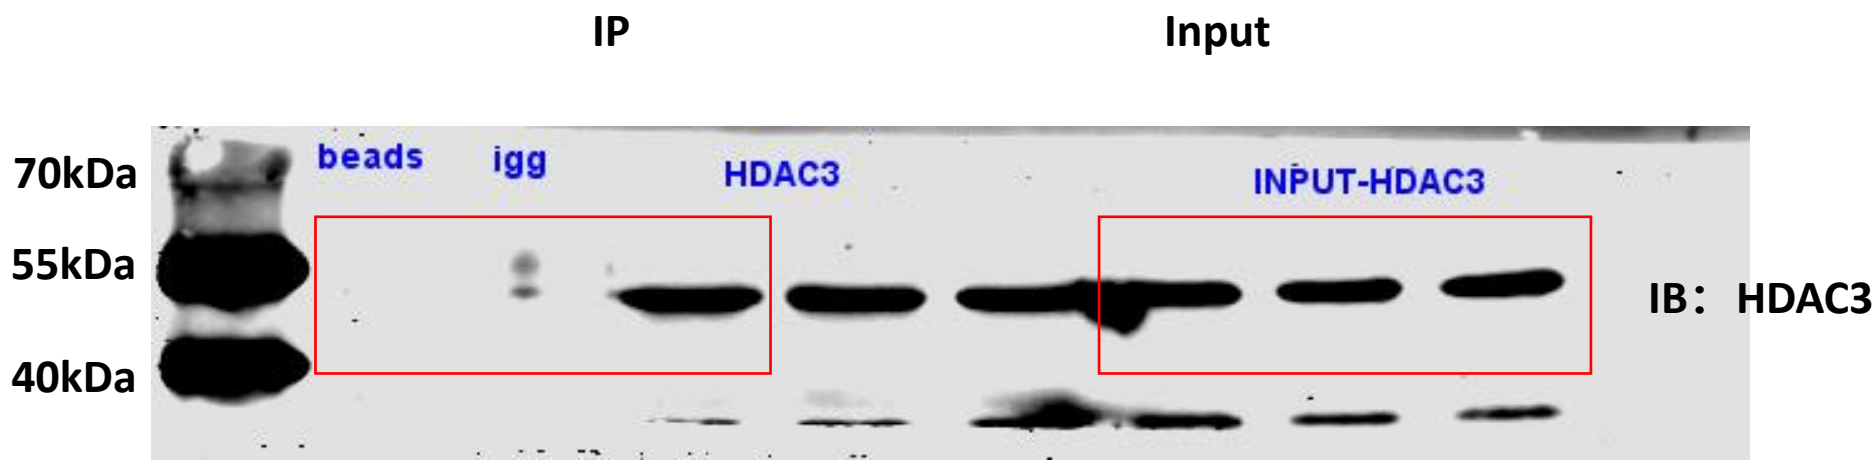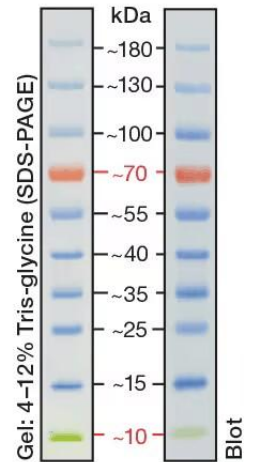

**Figure 4E** IP: HDAC3, IB: JunB, IB: TBL1XR1/TBLR1

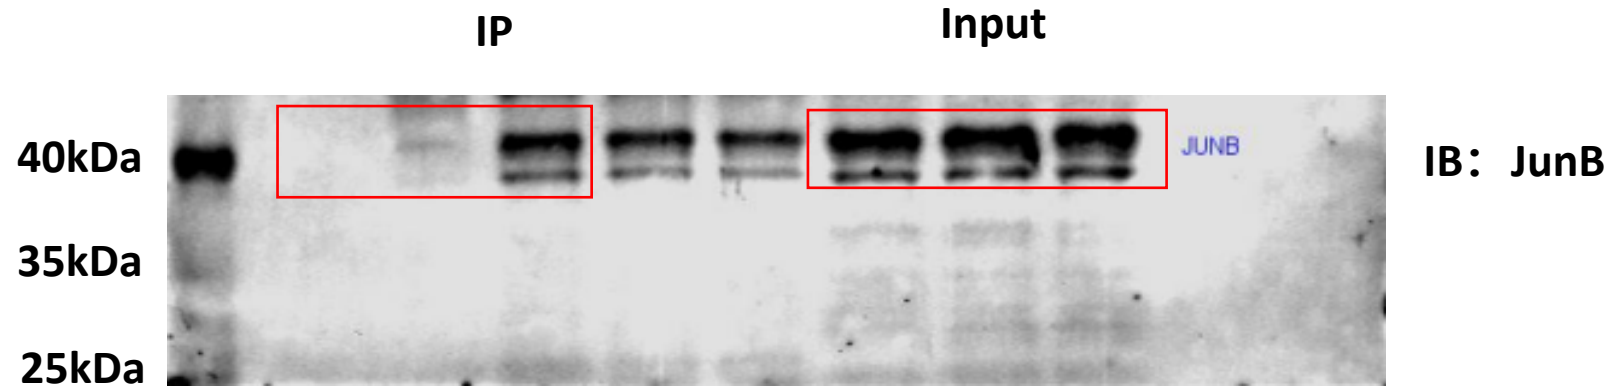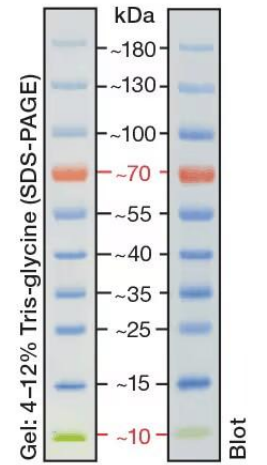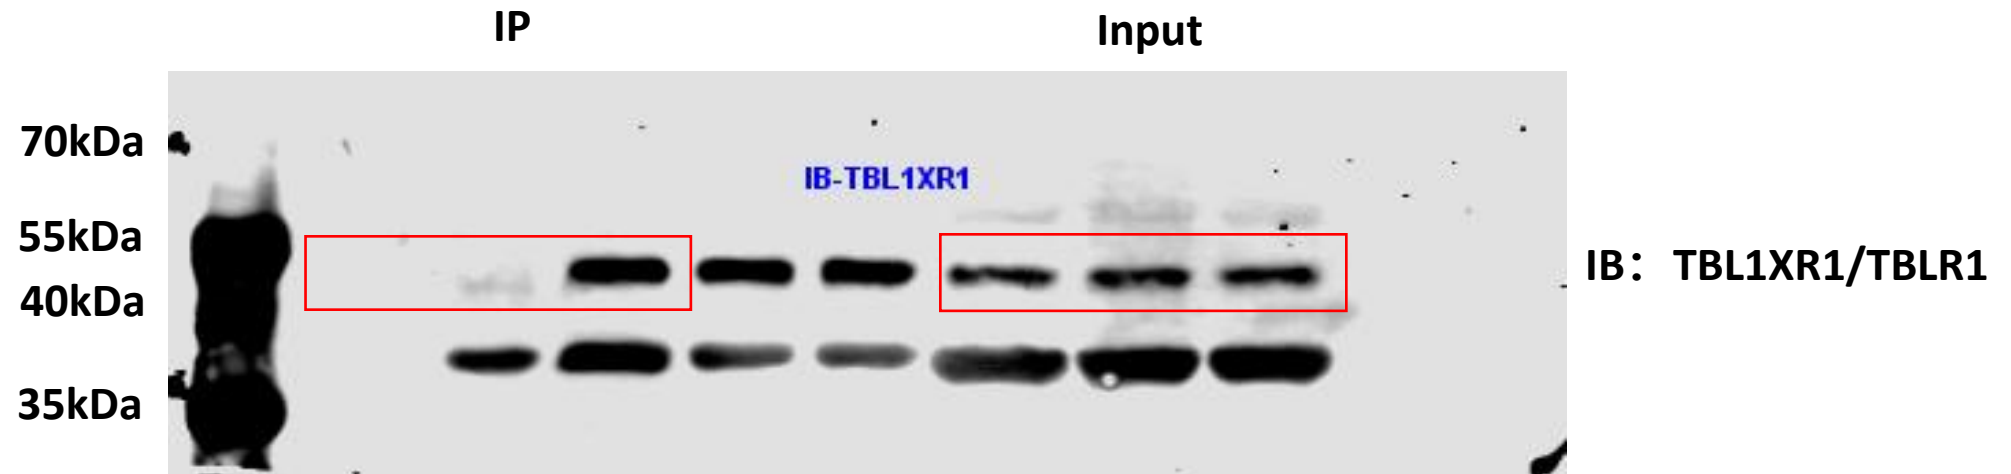



**Figure 4E IP: HDAC3, IB: NCOR2/SMRT**

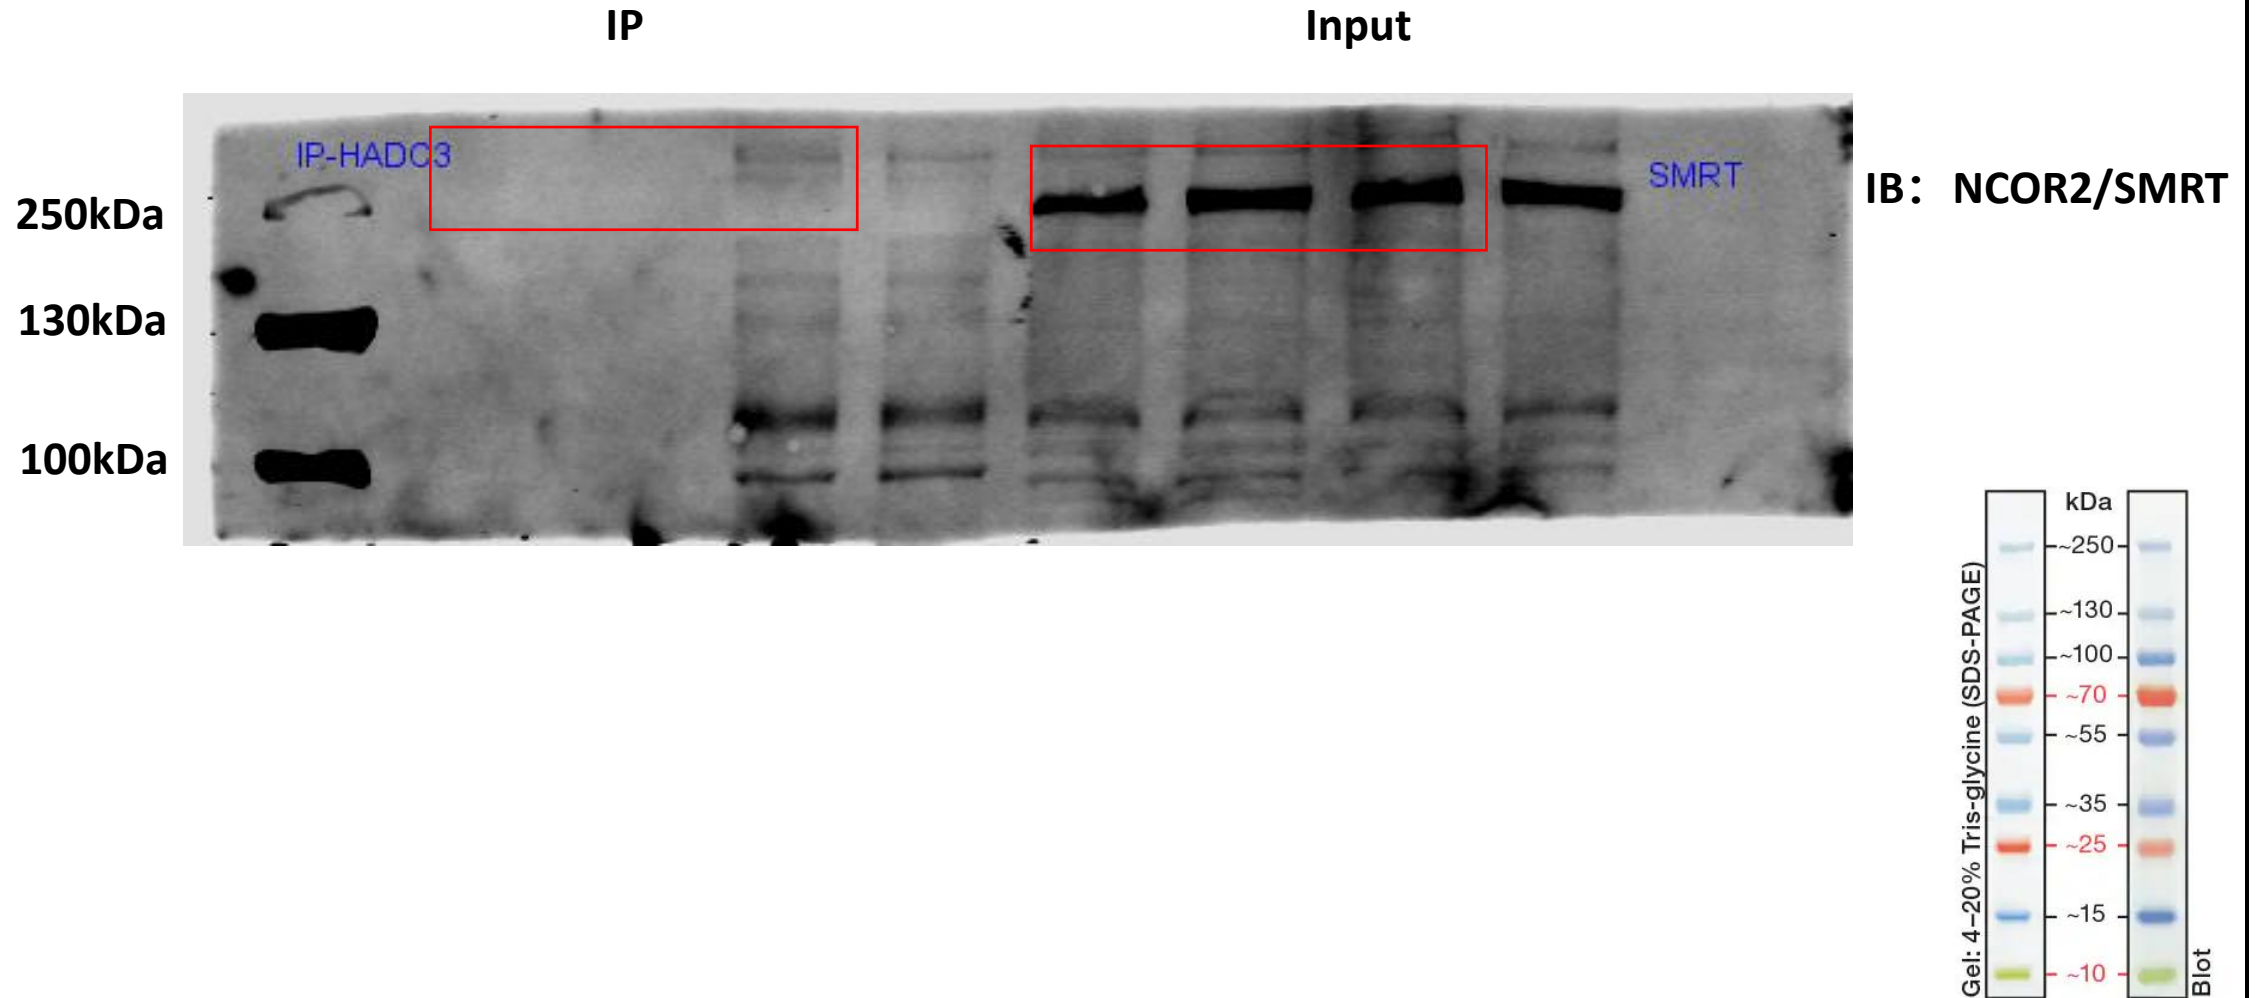

**Figure 4F** IP: Flag, IB: JunD, IB: Flag-NCOR2-013

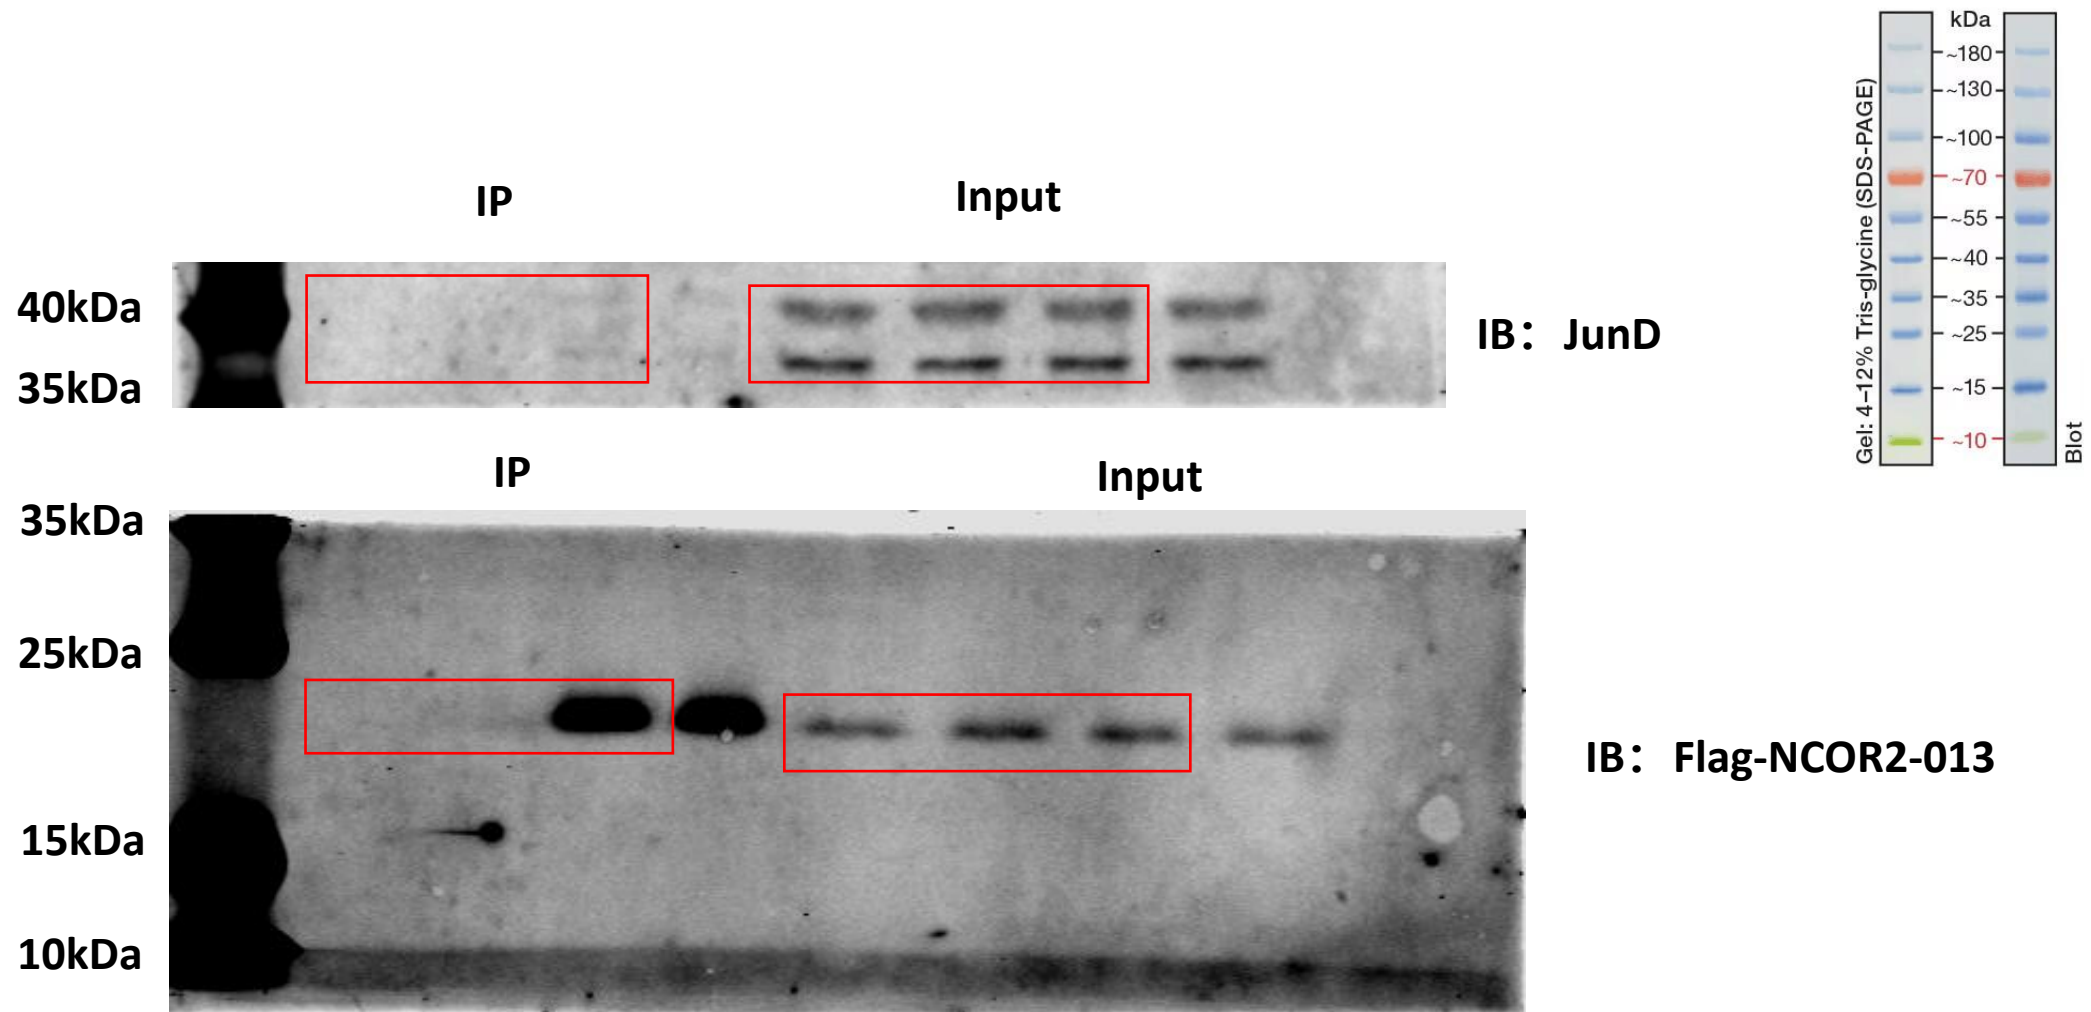



**Figure 4G** IP: Flag, IB: C-Jun, IB: Flag-NCOR2-013

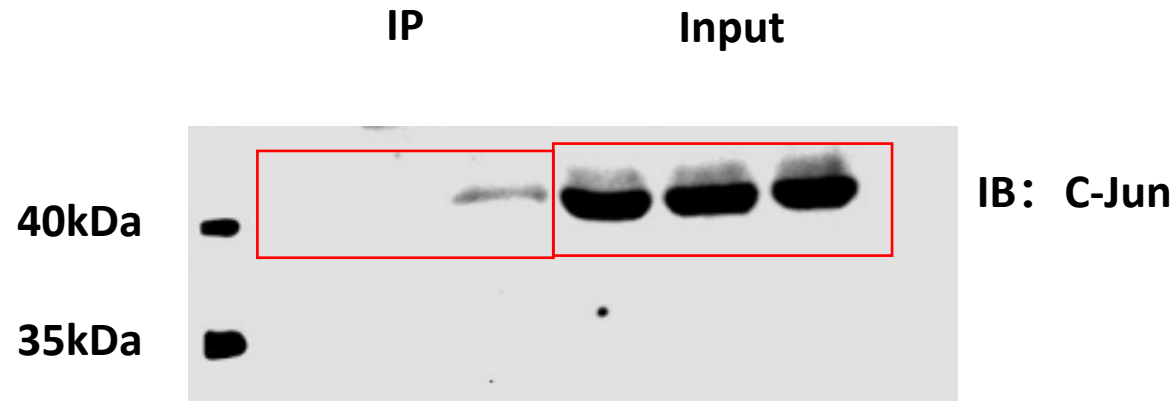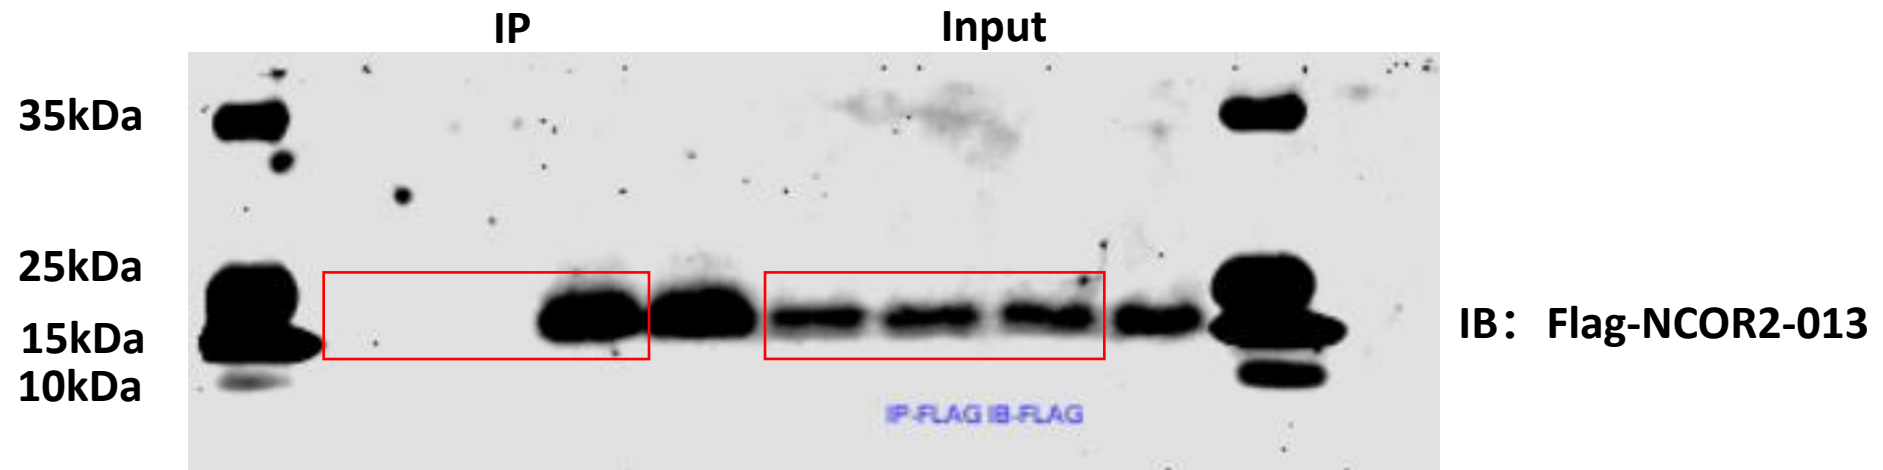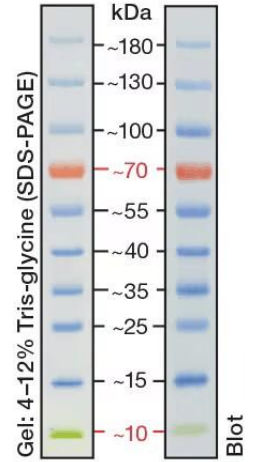

**Figure 4H 24h**

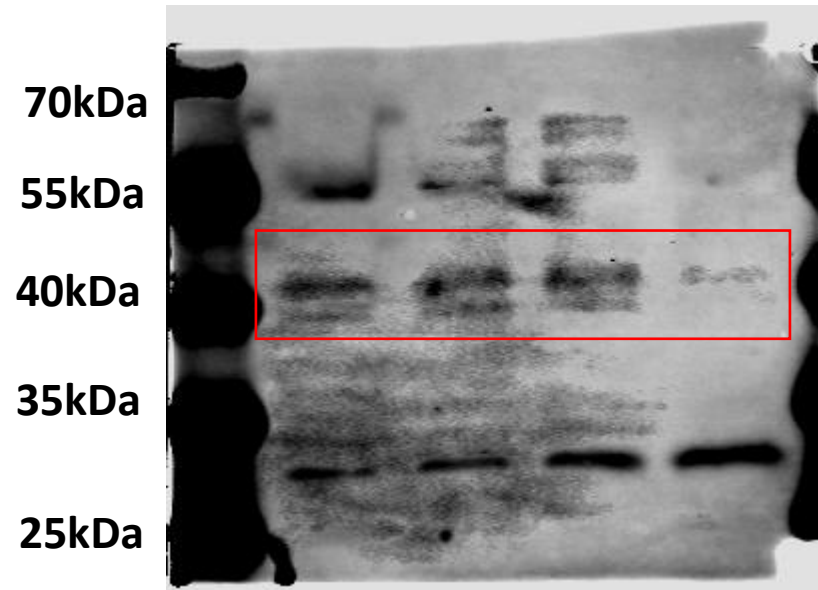

**IB: p-JunB**

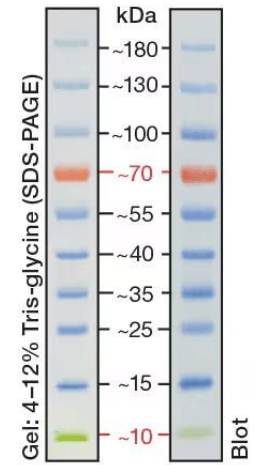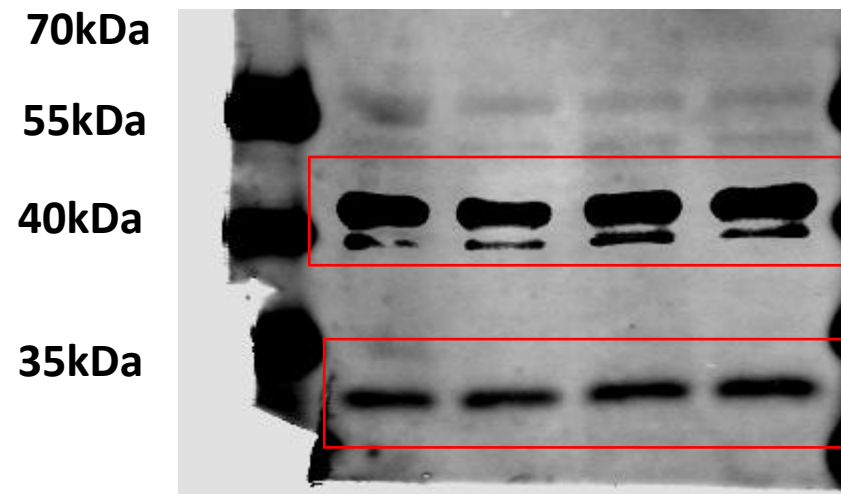

**IB: JunB**

**IB: GAPDH**

**Figure 4H 48h**

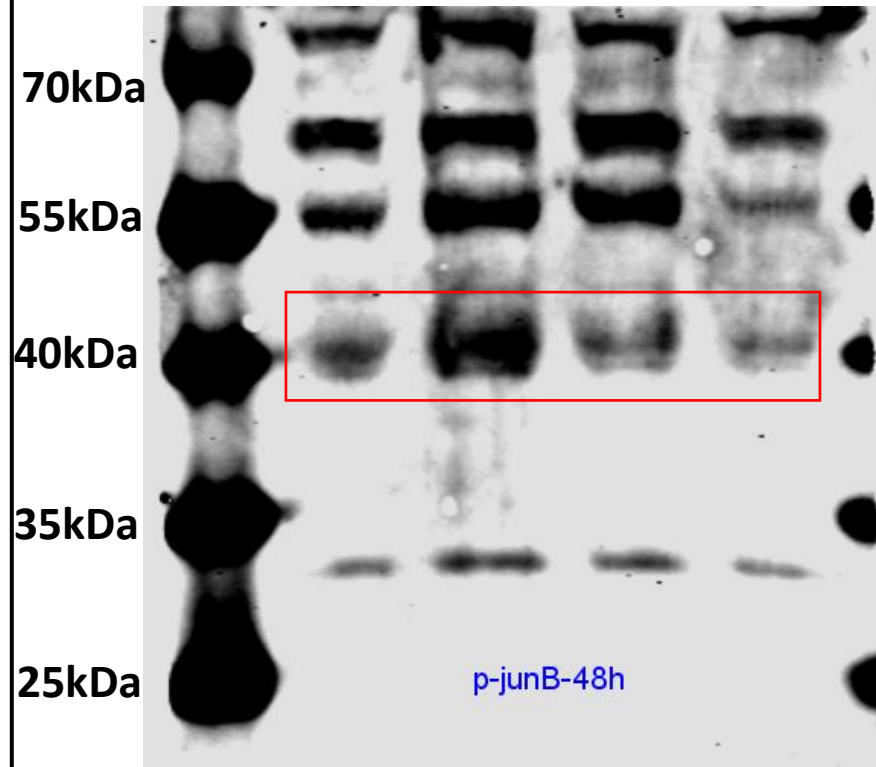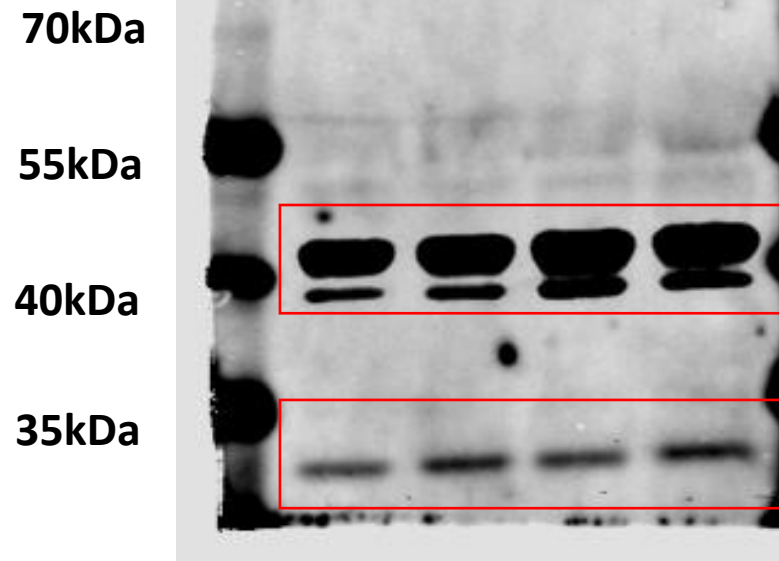

Figure 4I 24h

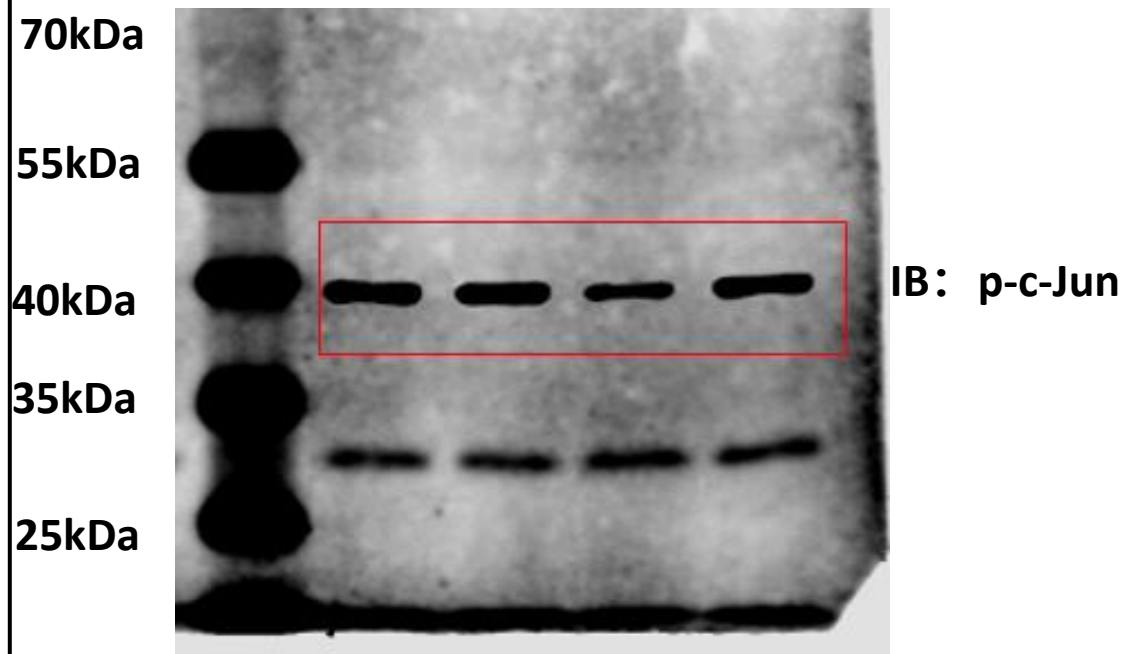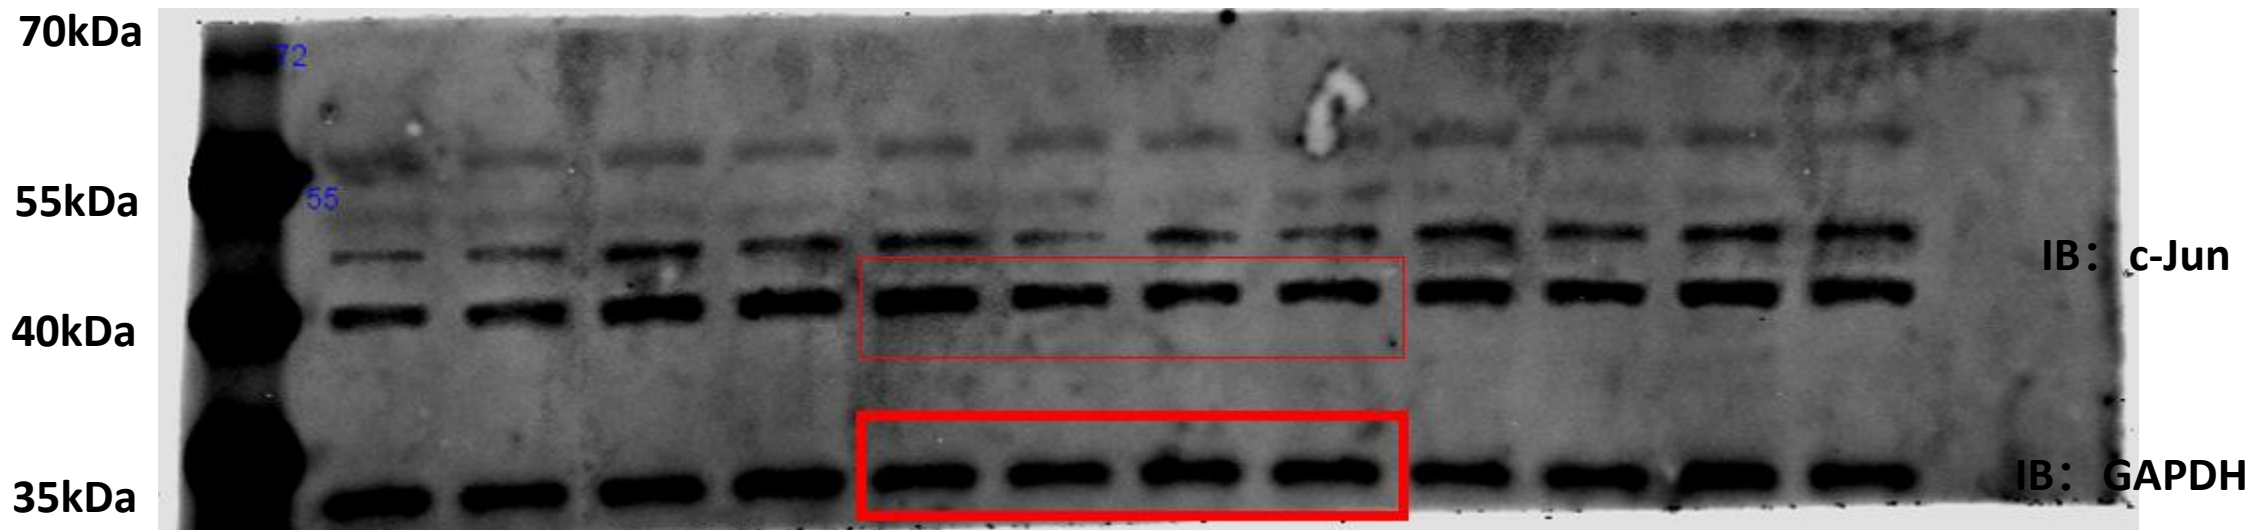

**Figure 4I 48h**

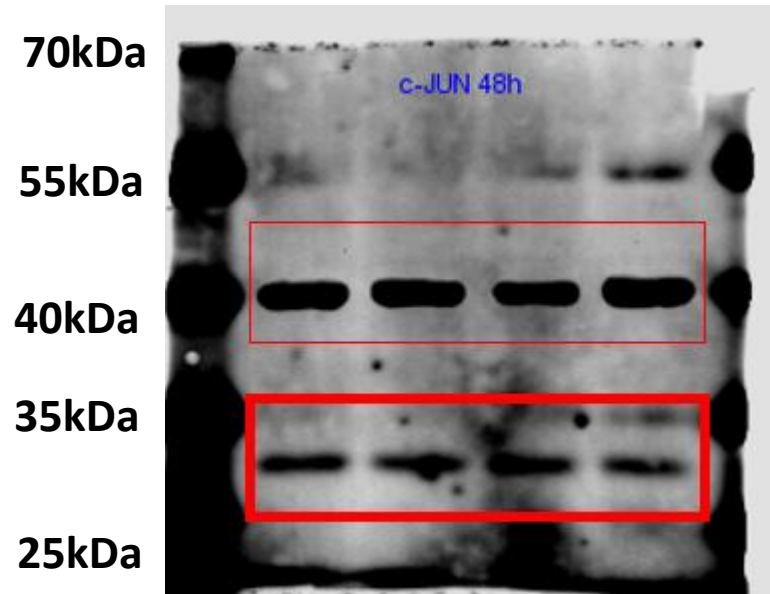

**IB: c-Jun**

**IB: GAPDH**

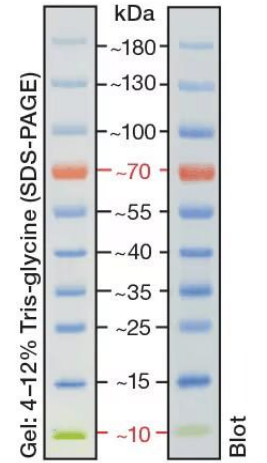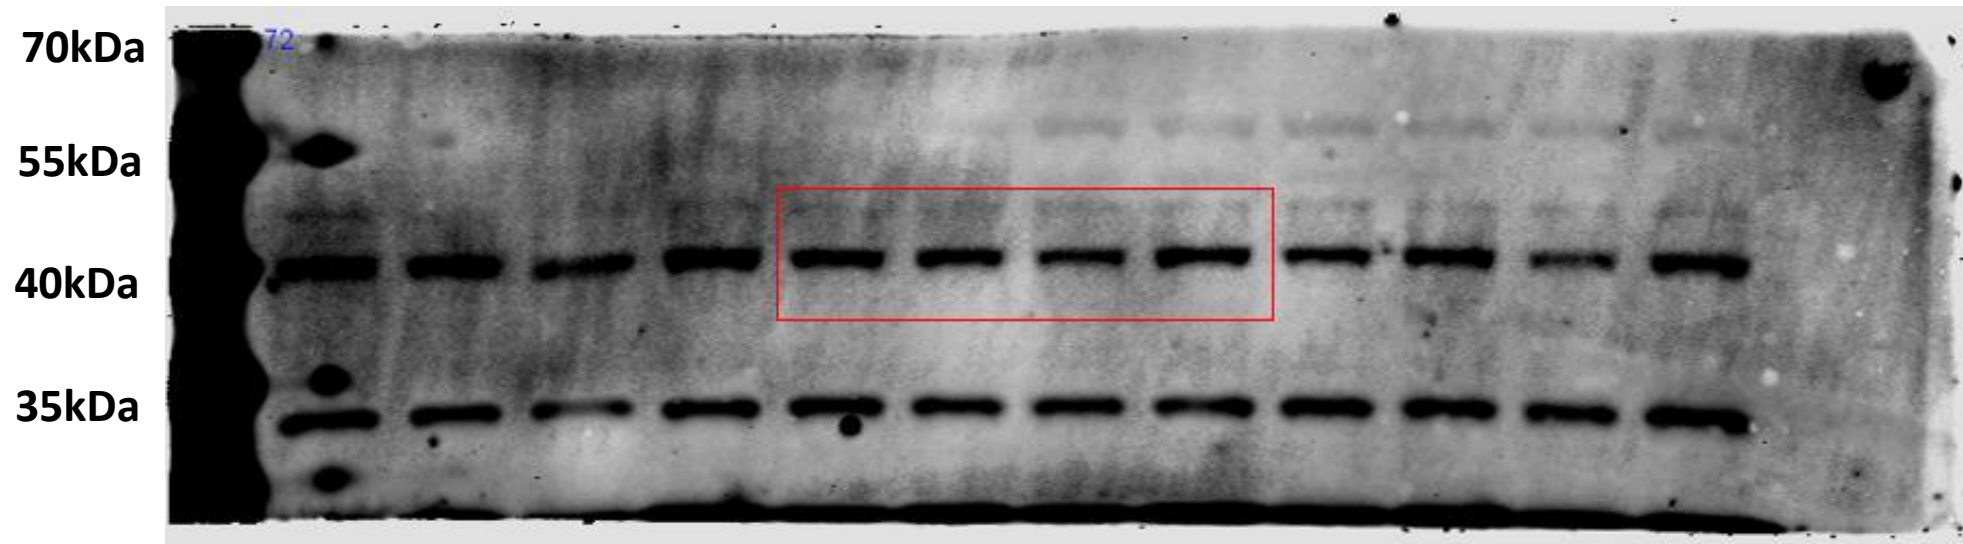

**IB: p-c-Jun**

**Figure 6A**

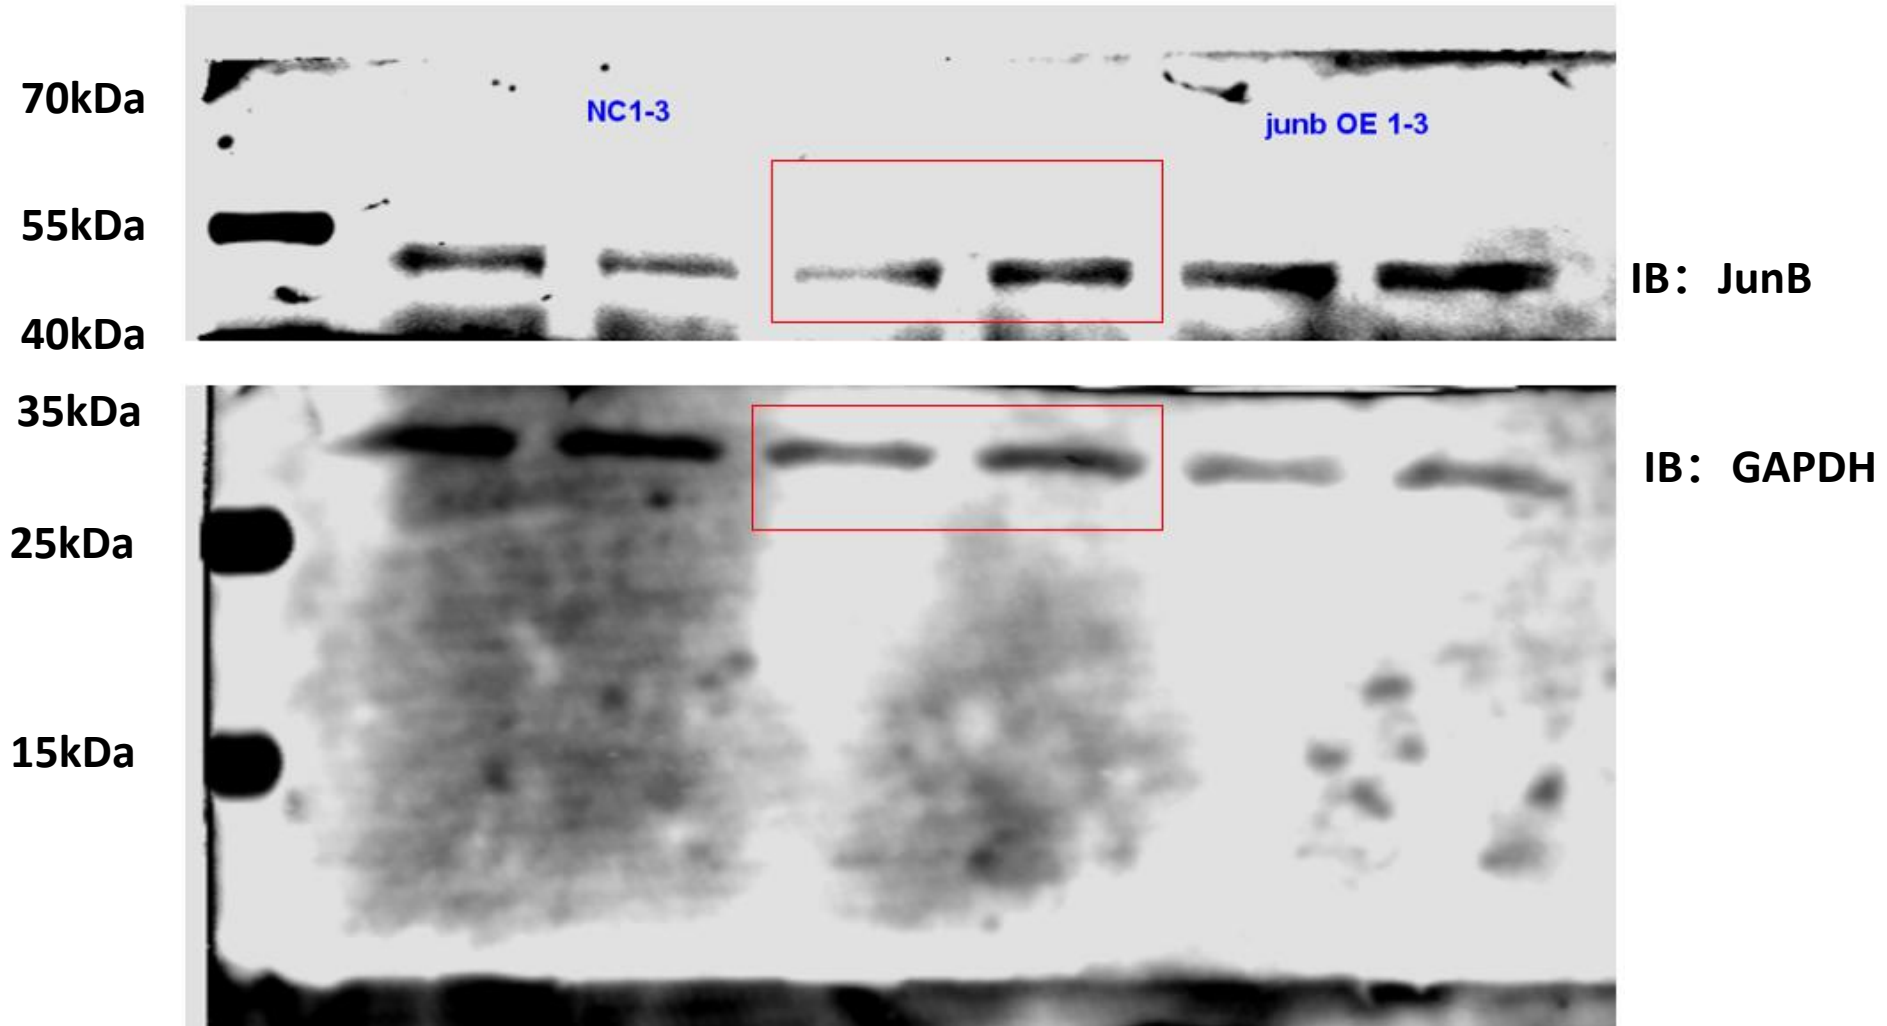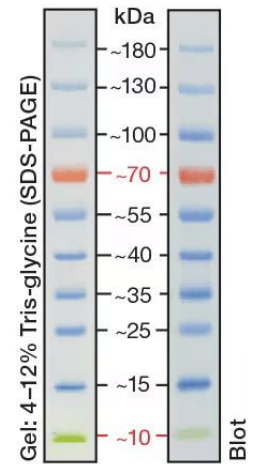



**Figure 7C**

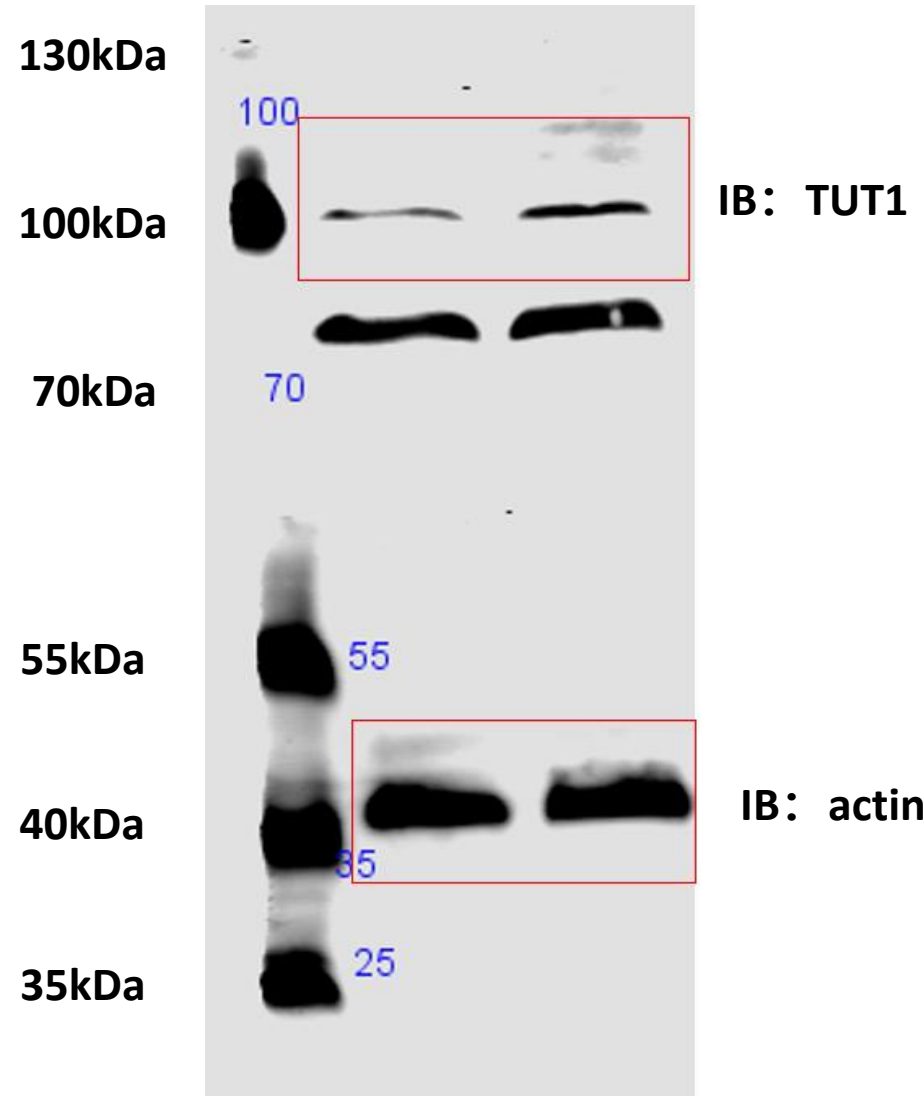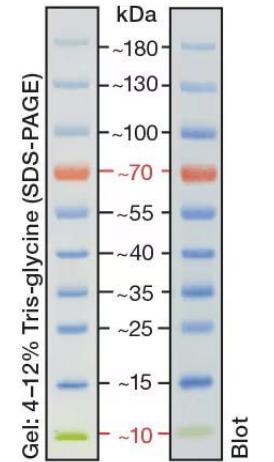

Figure 7F

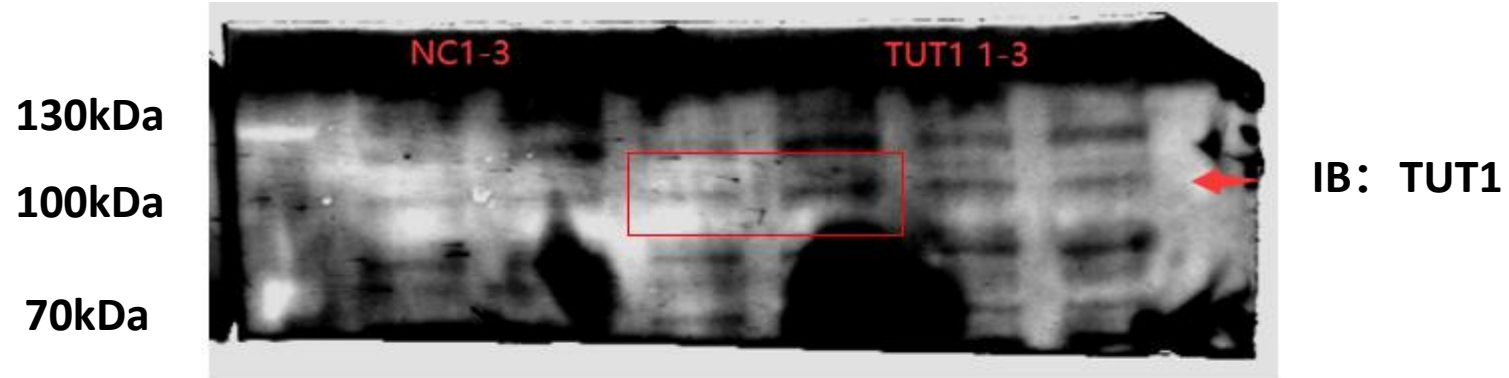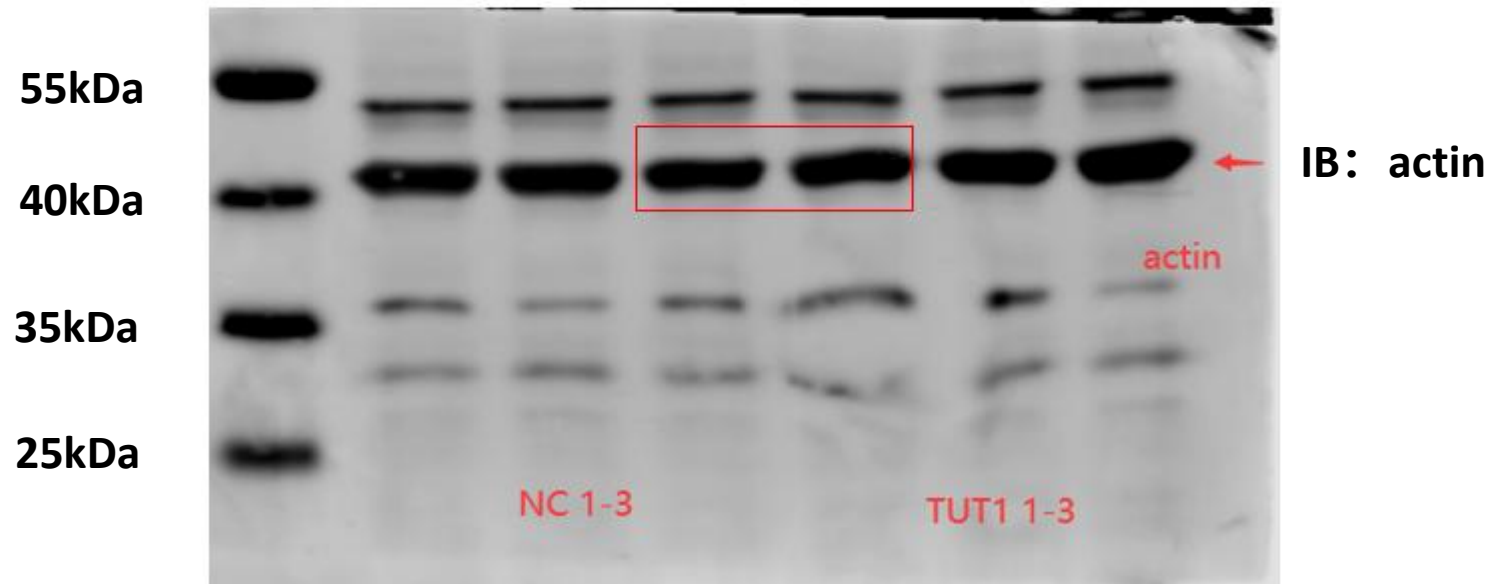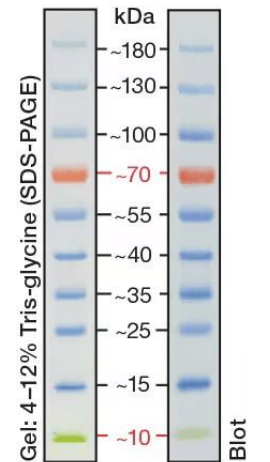



**Figure 7G**

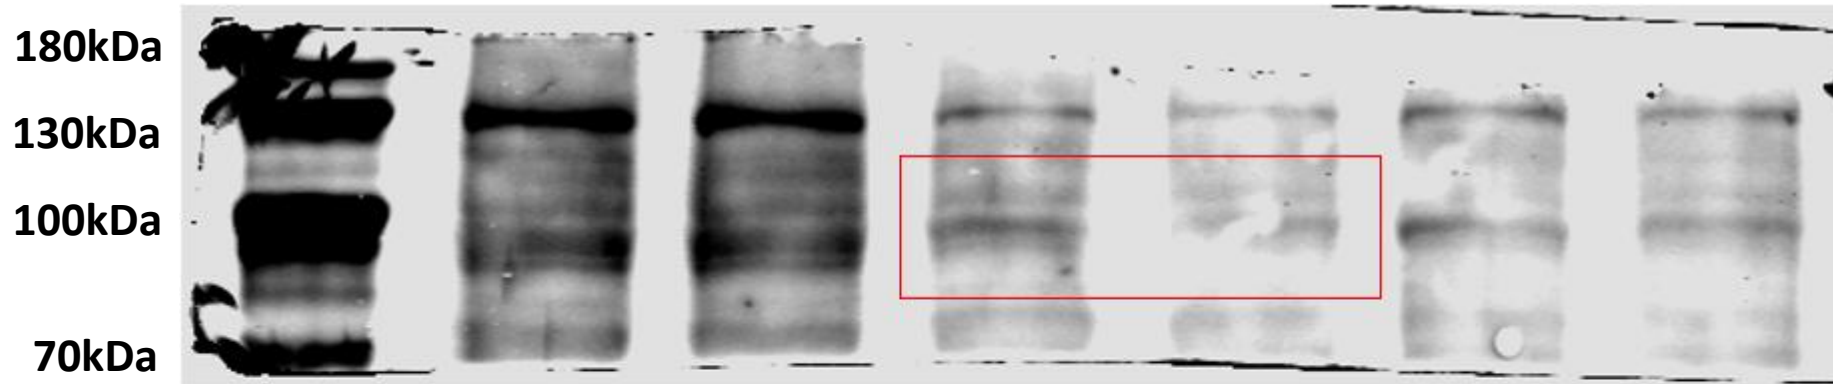

**IB: TUB1**

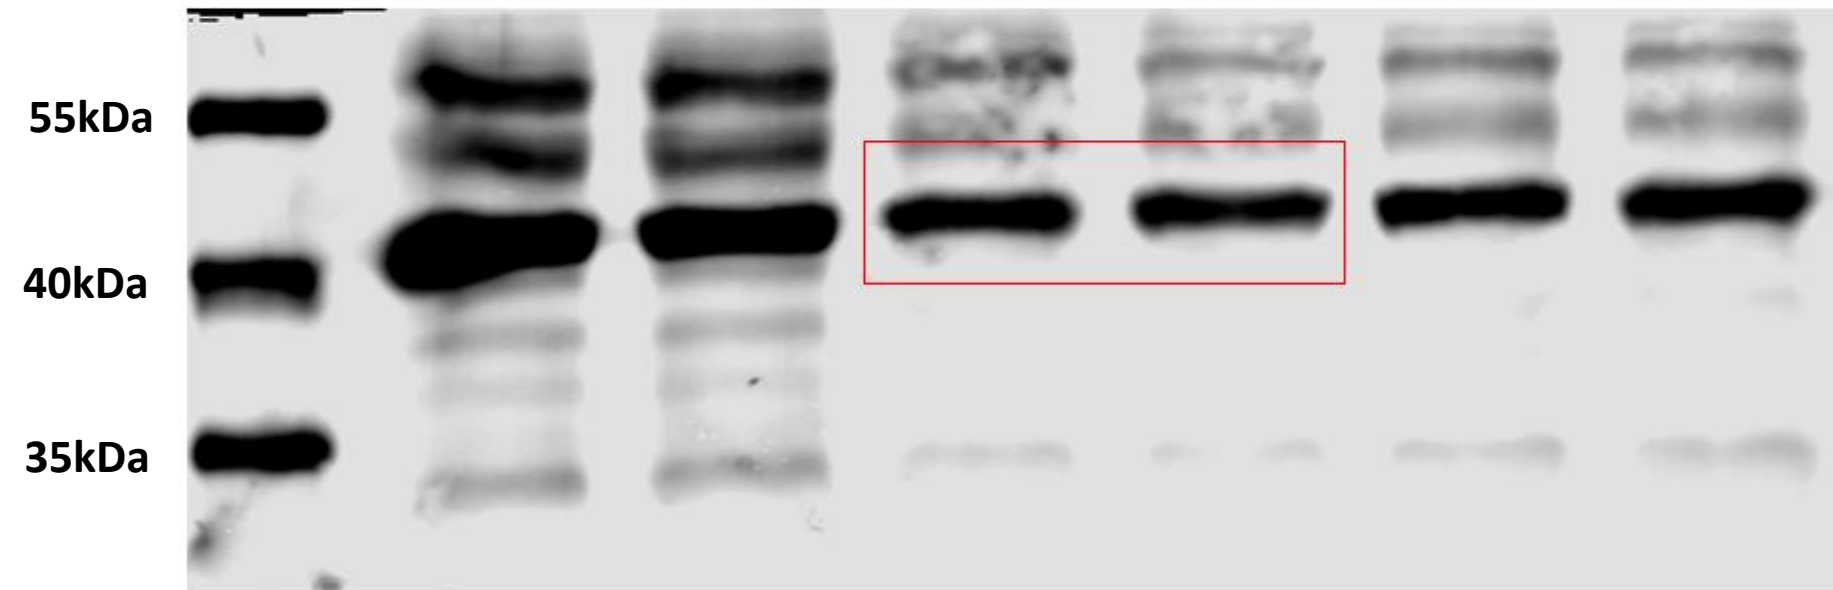

**IB: actin**

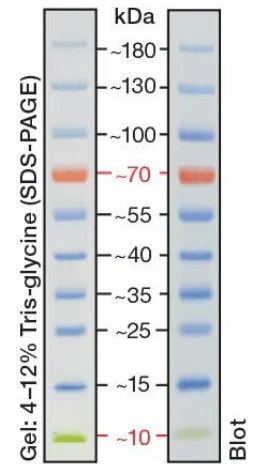

**Supplementary Table 1. The summary of the truncated transcripts generated by ES-type AS event predicted by rMATs**

| Gene          | Predicted transcript(s) matched the currently known transcript(s) | Matched currently known transcript(s)                   | Matched transcript(s) NOT detected in uninfected cells | Matched transcript(s) differentially highly expressed in infected cells ( <i>p</i> <sub>adj</sub> <0.05) |
|---------------|-------------------------------------------------------------------|---------------------------------------------------------|--------------------------------------------------------|----------------------------------------------------------------------------------------------------------|
| <i>NR1H3</i>  | Yes                                                               | <i>NR1H3-028, 029, 031, 003, 023, 012, 032</i>          | <i>NR1H3-029, 012</i> , yes; others, no                | No                                                                                                       |
| <i>PPARA</i>  | Yes                                                               | <i>PPARA-002, 006, 007</i>                              | <i>PPARA-002</i> , yes; others, no                     | No                                                                                                       |
| <i>TLR6</i>   | Yes                                                               | <i>TLR6-002, 003</i>                                    | Yes                                                    | No                                                                                                       |
| <i>IRF3</i>   | Yes                                                               | <i>IRF3-017, 009, 008, 012, 201, 023, 024, 202, 020</i> | <i>IRF3-023</i> , yes; others, no                      | <i>IRF3-020</i> , yes; others, no                                                                        |
| <i>MAP2K3</i> | Yes                                                               | <i>MAP2K3-201, 016, 013</i>                             | Yes                                                    | No                                                                                                       |
| <i>NCOR2</i>  | Yes                                                               | <i>NCOR2-013</i>                                        | Yes                                                    | Yes                                                                                                      |

The strategy for the screening of particular truncated transcript. (1) The truncated transcripts generated by ES-type AS event predicted by rMATs should be matched the currently known transcripts. (2) The truncated transcript is differentially highly expressed in *T. marneffei*-infected macrophages. (3) The truncated transcript can not be detected in uninfected cells.

Due to the expression in uninfected cells or/and insignificant difference in transcript expression, *NR1H3*, *PPARA*, *TLR6*, *IRF3* and *MAP2K3* were excluded.

**Supplementary Table 2. The differential expression analysis results of *NR1H3*, *PPARA*, *IRF3*, *MAP2K3* and *TLR6* transcripts in *T. marneffei*-infected THP-1 macrophages at 24 h post-infection.**

| transcript_<br>id   | transcript<br>_name         | Contro<br>I1    | Contro<br>I2    | Contro<br>I3    | <i>Tm1</i>      | <i>Tm2</i>      | <i>Tm3</i>      | <i>pvalue</i>  | <i>padj</i>    |
|---------------------|-----------------------------|-----------------|-----------------|-----------------|-----------------|-----------------|-----------------|----------------|----------------|
| ENST0000<br>0440187 | <i>NCOR2-0</i><br><i>13</i> | 0               | 0               | 0               | 17.755<br>60209 | 11.445<br>95335 | 26.842<br>60587 | 7.46E-0<br>6   | 0.0015<br>6278 |
| ENST0000<br>0453428 | <i>NCOR2-0</i><br><i>12</i> | 0               | 0               | 0               | 0               | 0               | 0               | NA             | NA             |
| ENST0000<br>0420698 | <i>NCOR2-0</i><br><i>04</i> | 0               | 0               | 0               | 5.0730<br>2917  | 3.5218<br>318   | 0               | 0.3066<br>841  | NA             |
| ENST0000<br>0356219 | <i>NCOR2-2</i><br><i>01</i> | 541.10<br>04671 | 7563.0<br>25857 | 294.32<br>80142 | 10154.<br>51338 | 357.46<br>59277 | 9554.0<br>50361 | NA             | NA             |
| ENST0000<br>0429285 | <i>NCOR2-0</i><br><i>01</i> | 6080.0<br>9621  | 0               | 7615.9<br>77832 | 0               | 6804.1<br>79037 | 0               | 0.7864<br>2596 | 0.9999<br>8262 |
| ENST0000<br>0397355 | <i>NCOR2-2</i><br><i>02</i> | 978.14<br>31521 | 0               | 922.42<br>01491 | 0               | 23.772<br>36465 | 0               | 0.0529<br>0452 | 0.7865<br>0535 |
| ENST0000<br>0405201 | <i>NCOR2-0</i><br><i>05</i> | 567.11<br>49127 | 1.2313<br>6207  | 0               | 2227.0<br>59805 | 1686.0<br>76974 | 357.58<br>18568 | 0.2131<br>1123 | 0.9999<br>8262 |
| ENST0000<br>0404621 | <i>NCOR2-0</i><br><i>02</i> | 415.19<br>05507 | 522.09<br>75193 | 0.9618<br>5626  | 1051.8<br>08048 | 229.79<br>95249 | 1950.8<br>82248 | 0.2810<br>5049 | 0.9999<br>8262 |
| ENST0000<br>0404121 | <i>NCOR2-2</i><br><i>03</i> | 9.3652<br>0039  | 24.627<br>24147 | 5.7711<br>3753  | 9.3005<br>5347  | 4.4022<br>8975  | 4.7933<br>2248  | 0.2091<br>8319 | 0.9999<br>8262 |
| ENST0000<br>0458234 | <i>NCOR2-0</i><br><i>03</i> | 468.26<br>00196 | 1.2313<br>6207  | 542.48<br>69282 | 0               | 426.14<br>16478 | 0               | 0.6856<br>1495 | 0.9999<br>8262 |
| ENST0000<br>0542927 | <i>NCOR2-0</i><br><i>24</i> | 21.852<br>13425 | 18.470<br>43111 | 19.237<br>12511 | 14.373<br>58264 | 22.891<br>9067  | 16.297<br>29642 | 0.7193<br>9617 | 0.9999<br>8262 |
| ENST0000<br>0443451 | <i>NCOR2-0</i><br><i>22</i> | 347.55<br>29924 | 395.26<br>72257 | 382.81<br>87897 | 618.90<br>95585 | 415.57<br>61524 | 533.97<br>6124  | 0.0520<br>8474 | 0.7820<br>5829 |
| ENST0000<br>0448008 | <i>NCOR2-0</i><br><i>19</i> | 41.623<br>11286 | 38.172<br>22429 | 30.779<br>40018 | 34.665<br>69931 | 86.284<br>87909 | 35.470<br>58633 | 0.3690<br>7157 | 0.9999<br>8262 |
| ENST0000<br>0418829 | <i>NCOR2-0</i><br><i>17</i> | 2.0811<br>5564  | 0               | 15.389<br>70009 | 29.592<br>67015 | 9.6850<br>3745  | 9.5866<br>4495  | 0.3179<br>5707 | 0.9999<br>8262 |
| ENST0000<br>0440337 | <i>NCOR2-0</i><br><i>15</i> | 54.110<br>04671 | 64.030<br>82783 | 91.376<br>34428 | 100.61<br>50785 | 46.664<br>27135 | 40.263<br>90881 | 0.7723<br>0653 | 0.9999<br>8262 |
| ENST0000<br>0461081 | <i>NCOR2-0</i><br><i>06</i> | 118.62<br>58716 | 156.38<br>29834 | 75.024<br>78794 | 214.75<br>82348 | 61.632<br>05649 | 65.189<br>18569 | 0.9626<br>0225 | 0.9999<br>8262 |
| ENST0000<br>0542565 | <i>NCOR2-0</i><br><i>08</i> | 19.770<br>97861 | 75.113<br>0865  | 14.427<br>84383 | 149.65<br>43605 | 15.848<br>2431  | 126.54<br>37134 | 0.1921<br>929  | 0.9999<br>8262 |
| ENST0000<br>0448614 | <i>NCOR2-0</i><br><i>09</i> | 1.0405<br>7782  | 0               | 26.931<br>97516 | 0.8455<br>0486  | 6.1632<br>0565  | 1.9173<br>2899  | 0.3977<br>9333 | 0.9999<br>8262 |
| ENST0000<br>0536195 | <i>NCOR2-0</i><br><i>20</i> | 65.556<br>40275 | 39.403<br>58636 | 19.237<br>12511 | 27.056<br>15556 | 11.445<br>95335 | 54.643<br>87624 | 0.6154<br>9353 | 0.9999<br>8262 |
| ENST0000<br>0413172 | <i>NCOR2-0</i><br><i>18</i> | 11.446<br>35604 | 0               | 8.6567<br>063   | 43.966<br>25279 | 9.6850<br>3745  | 13.421<br>30294 | 0.1887<br>402  | 0.9999<br>8262 |

| <b>transcript_<br/>id</b> | <b>transcript<br/>_name</b> | <b>Contro<br/>I1</b> | <b>Contro<br/>I2</b> | <b>Contro<br/>I3</b> | <b>Tm1</b>      | <b>Tm2</b>      | <b>Tm3</b>      | <b>pvalue</b>  | <b>padj</b>    |
|---------------------------|-----------------------------|----------------------|----------------------|----------------------|-----------------|-----------------|-----------------|----------------|----------------|
| ENST0000<br>0494460       | <i>NCOR2-0</i><br><i>07</i> | 21.852<br>13425      | 12.313<br>62074      | 8.6567<br>063        | 16.910<br>09723 | 20.250<br>53285 | 5.7519<br>8697  | 0.9915<br>8308 | 0.9999<br>8262 |
| ENST0000<br>0474079       | <i>NCOR2-0</i><br><i>14</i> | 16.649<br>24514      | 2.4627<br>2415       | 9.6185<br>6256       | 9.3005<br>5347  | 5.2827<br>477   | 20.131<br>9544  | 0.7891<br>1548 | 0.9999<br>8262 |
| ENST0000<br>0493859       | <i>NCOR2-0</i><br><i>10</i> | 20.811<br>55643      | 2.4627<br>2415       | 5.7711<br>3753       | 11.837<br>06806 | 12.326<br>4113  | 29.718<br>59936 | 0.3753<br>9192 | 0.9999<br>8262 |
| ENST0000<br>0473999       | <i>NCOR2-0</i><br><i>11</i> | 41.623<br>11286      | 33.246<br>77599      | 63.482<br>51287      | 81.168<br>46669 | 54.588<br>3929  | 64.230<br>52119 | 0.2045<br>823  | 0.9999<br>8262 |
| ENST0000<br>0464377       | <i>NCOR2-0</i><br><i>16</i> | 12.486<br>93386      | 13.544<br>98281      | 10.580<br>41881      | 15.219<br>0875  | 9.6850<br>3745  | 43.139<br>90229 | 0.2491<br>9321 | 0.9999<br>8262 |
| ENST0000<br>0495866       | <i>NR1H3-02</i><br><i>6</i> | 0                    | 0                    | 0                    | 0               | 0               | 0               | NA             | NA             |
| ENST0000<br>0529540       | <i>NR1H3-02</i><br><i>9</i> | 0                    | 0                    | 0                    | 0               | 0               | 0               | NA             | NA             |
| ENST0000<br>0395397       | <i>NR1H3-03</i><br><i>1</i> | 0                    | 307.84<br>05184      | 26.931<br>97516      | 25.365<br>14584 | 0               | 47.933<br>22477 | 0.3915<br>3591 | 0.9999<br>8262 |
| ENST0000<br>0405576       | <i>NR1H3-00</i><br><i>3</i> | 0                    | 40.634<br>94843      | 22.122<br>69388      | 24.519<br>64098 | 0               | 0               | 0.6631<br>147  | 0.9999<br>8262 |
| ENST0000<br>0531660       | <i>NR1H3-03</i><br><i>7</i> | 0                    | 0                    | 19.237<br>12511      | 11.837<br>06806 | 0               | 0               | 0.8520<br>8738 | 0.9999<br>8262 |
| ENST0000<br>0532630       | <i>NR1H3-03</i><br><i>6</i> | 0                    | 0                    | 0                    | 0               | 0               | 0               | NA             | NA             |
| ENST0000<br>0407404       | <i>NR1H3-00</i><br><i>2</i> | 0                    | 0                    | 0                    | 0               | 0               | 0               | NA             | NA             |
| ENST0000<br>0444396       | <i>NR1H3-01</i><br><i>0</i> | 0                    | 16.007<br>70696      | 0                    | 0               | 0               | 24.925<br>27688 | 0.8642<br>3579 | 0.9999<br>8262 |
| ENST0000<br>0457932       | <i>NR1H3-01</i><br><i>1</i> | 0                    | 0                    | 0                    | 0               | 0               | 0               | NA             | NA             |
| ENST0000<br>0412937       | <i>NR1H3-01</i><br><i>2</i> | 0                    | 0                    | 0                    | 0               | 0               | 0               | NA             | NA             |
| ENST0000<br>0449369       | <i>NR1H3-01</i><br><i>3</i> | 0                    | 0                    | 0                    | 0               | 0               | 0               | NA             | NA             |
| ENST0000<br>0486991       | <i>NR1H3-00</i><br><i>9</i> | 0                    | 0                    | 0                    | 0               | 0               | 49.850<br>55376 | 0.1020<br>103  | 0.9345<br>5796 |
| ENST0000<br>0437276       | <i>NR1H3-01</i><br><i>7</i> | 0                    | 0                    | 0                    | 0               | 0               | 0               | NA             | NA             |
| ENST0000<br>0436029       | <i>NR1H3-01</i><br><i>6</i> | 0                    | 0                    | 0                    | 0               | 0               | 0               | NA             | NA             |
| ENST0000<br>0476086       | <i>NR1H3-03</i><br><i>8</i> | 0                    | 0                    | 26.931<br>97516      | 19.446<br>61181 | 0               | 11.503<br>97395 | 0.9487<br>0555 | 0.9999<br>8262 |
| ENST0000<br>0530310       | <i>NR1H3-03</i><br><i>5</i> | 0                    | 0                    | 0                    | 6.7640<br>3889  | 9.6850<br>3745  | 0               | 0.1748<br>8353 | 0.9981<br>5157 |

| <b>transcript_<br/>id</b> | <b>transcript<br/>_name</b> | <b>Contro<br/>I1</b> | <b>Contro<br/>I2</b> | <b>Contro<br/>I3</b> | <b>Tm1</b>      | <b>Tm2</b>      | <b>Tm3</b>      | <b>pvalue</b>  | <b>padj</b>    |
|---------------------------|-----------------------------|----------------------|----------------------|----------------------|-----------------|-----------------|-----------------|----------------|----------------|
| ENST00000441012           | <i>NR1H3-03</i><br><i>0</i> | 218.52<br>13425      | 0                    | 196.21<br>86761      | 188.54<br>75841 | 180.49<br>38797 | 407.43<br>24106 | 0.5918<br>476  | 0.9999<br>8262 |
| ENST00000467728           | <i>NR1H3-00</i><br><i>1</i> | 182.10<br>11187      | 124.36<br>75694      | 172.17<br>22698      | 239.27<br>78758 | 169.92<br>83843 | 71.899<br>83716 | 0.9893<br>9671 | 0.9999<br>8262 |
| ENST00000405853           | <i>NR1H3-00</i><br><i>6</i> | 39.541<br>95721      | 0                    | 24.046<br>40639      | 27.901<br>66042 | 31.696<br>4862  | 0               | 0.9661<br>5561 | 0.9999<br>8262 |
| ENST00000481020           | <i>NR1H3-00</i><br><i>5</i> | 3.1217<br>3346       | 25.858<br>60355      | 17.313<br>4126       | 19.446<br>61181 | 6.1632<br>0565  | 8.6279<br>8046  | 0.6639<br>8459 | 0.9999<br>8262 |
| ENST00000481889           | <i>NR1H3-02</i><br><i>3</i> | 1.0405<br>7782       | 30.784<br>05184      | 13.465<br>98758      | 6.7640<br>3889  | 0.8804<br>5795  | 39.305<br>24431 | 0.9735<br>3898 | 0.9999<br>8262 |
| ENST00000527464           | <i>NR1H3-02</i><br><i>8</i> | 9.3652<br>0039       | 0                    | 6.7329<br>9379       | 0.8455<br>0486  | 3.5218<br>318   | 0               | 0.3402<br>6224 | 0.9999<br>8262 |
| ENST00000527949           | <i>NR1H3-03</i><br><i>2</i> | 30.176<br>75682      | 32.015<br>41392      | 15.389<br>70009      | 27.901<br>66042 | 53.707<br>93495 | 15.338<br>63193 | 0.6326<br>7705 | 0.9999<br>8262 |
| ENST00000436778           | <i>NR1H3-00</i><br><i>7</i> | 7.2840<br>4475       | 7.3881<br>7244       | 1.9237<br>1251       | 8.4550<br>4861  | 5.2827<br>477   | 8.6279<br>8046  | 0.5715<br>5624 | 0.9999<br>8262 |
| ENST00000420369           | <i>NR1H3-01</i><br><i>9</i> | 78.043<br>3366       | 11.082<br>25866      | 72.139<br>21917      | 75.249<br>93266 | 54.588<br>3929  | 0               | 0.8529<br>354  | 0.9999<br>8262 |
| ENST00000419652           | <i>NR1H3-01</i><br><i>4</i> | 31.217<br>33464      | 44.329<br>03465      | 27.893<br>83141      | 27.901<br>66042 | 20.250<br>53285 | 15.338<br>63193 | 0.1252<br>3099 | 0.9644<br>7689 |
| ENST00000461778           | <i>NR1H3-01</i><br><i>5</i> | 2.0811<br>5564       | 0                    | 4.8092<br>8128       | 1.6910<br>0972  | 0.8804<br>5795  | 0               | 0.4572<br>6338 | NA             |
| ENST00000525441           | <i>NR1H3-03</i><br><i>9</i> | 13.527<br>51168      | 0                    | 9.6185<br>6256       | 6.7640<br>3889  | 17.609<br>159   | 8.6279<br>8046  | 0.6916<br>3111 | 0.9999<br>8262 |
| ENST00000473222           | <i>NR1H3-02</i><br><i>2</i> | 0                    | 0                    | 0                    | 0               | 0               | 0               | NA             | NA             |
| ENST00000483882           | <i>NR1H3-02</i><br><i>1</i> | 32.257<br>91246      | 61.568<br>10369      | 81.757<br>78173      | 74.404<br>4278  | 51.066<br>5611  | 29.718<br>59936 | 0.7683<br>0051 | 0.9999<br>8262 |
| ENST00000462051           | <i>NR1H3-02</i><br><i>4</i> | 24.973<br>86771      | 4.9254<br>4829       | 0.9618<br>5626       | 21.983<br>12639 | 16.728<br>70105 | 21.090<br>6189  | 0.4074<br>3449 | 0.9999<br>8262 |
| ENST00000498548           | <i>NR1H3-01</i><br><i>8</i> | 13.527<br>51168      | 16.007<br>70696      | 13.465<br>98758      | 9.3005<br>5347  | 10.565<br>4954  | 9.5866<br>4495  | 0.2610<br>7015 | 0.9999<br>8262 |
| ENST00000487913           | <i>NR1H3-00</i><br><i>8</i> | 15.608<br>66732      | 34.478<br>13806      | 38.474<br>25022      | 36.356<br>70904 | 21.130<br>9908  | 16.297<br>29642 | 0.6704<br>9247 | 0.9999<br>8262 |
| ENST00000494018           | <i>NR1H3-02</i><br><i>5</i> | 1.0405<br>7782       | 8.6195<br>3452       | 0.9618<br>5626       | 0.8455<br>0486  | 0.8804<br>5795  | 0.9586<br>645   | 0.2055<br>638  | NA             |
| ENST00000262735           | <i>PPARA-2</i><br><i>01</i> | 0                    | 0                    | 0                    | 0               | 0               | 0               | NA             | NA             |
| ENST00000460086           | <i>PPARA-0</i><br><i>04</i> | 0                    | 0                    | 0                    | 0               | 0               | 0               | NA             | NA             |
| ENST00000396000           | <i>PPARA-2</i><br><i>02</i> | 75.962<br>18096      | 9.8508<br>9659       | 33.664<br>96895      | 7.6095<br>4375  | 16.728<br>70105 | 130.37<br>83714 | 0.7761<br>0553 | 0.9999<br>8262 |

| transcript_<br>id   | transcript<br>_name         | Contro<br>I1    | Contro<br>I2    | Contro<br>I3    | Tm1             | Tm2             | Tm3             | pvalue          | padj            |
|---------------------|-----------------------------|-----------------|-----------------|-----------------|-----------------|-----------------|-----------------|-----------------|-----------------|
| ENST0000<br>0407236 | <i>PPARA-0</i><br><i>01</i> | 3.1217<br>3346  | 588.59<br>10712 | 229.88<br>36451 | 1713.8<br>38354 | 1075.0<br>39157 | 0               | 0.4485<br>5789  | 0.9999<br>8262  |
| ENST0000<br>0402126 | <i>PPARA-0</i><br><i>08</i> | 10.405<br>77821 | 27.089<br>96562 | 35.588<br>68146 | 36.356<br>70904 | 27.294<br>19645 | 86.279<br>80459 | 0.1756<br>1615  | 0.9990<br>6307  |
| ENST0000<br>0493286 | <i>PPARA-0</i><br><i>05</i> | 142.55<br>91615 | 169.92<br>79662 | 166.40<br>11322 | 74.404<br>4278  | 49.305<br>6452  | 162.01<br>42997 | 0.1895<br>055   | 0.9999<br>8262  |
| ENST0000<br>0434345 | <i>PPARA-2</i><br><i>03</i> | 112.38<br>24047 | 119.44<br>21212 | 202.95<br>16699 | 0<br>0          | 71.317<br>09394 | 0               | 0.2586<br>6364  | 0.9999<br>8262  |
| ENST0000<br>0481567 | <i>PPARA-0</i><br><i>06</i> | 4.1623<br>1129  | 12.313<br>62074 | 4.8092<br>8128  | 10.146<br>05834 | 10.565<br>4954  | 3.8346<br>5798  | 0.7789<br>5214  | 0.9999<br>8262  |
| ENST0000<br>0415785 | <i>PPARA-0</i><br><i>09</i> | 13.527<br>51168 | 0<br>0          | 5.7711<br>3753  | 0<br>0          | 0<br>0          | 0               | 0.1275<br>9294  | 0.9668<br>4162  |
| ENST0000<br>0420804 | <i>PPARA-0</i><br><i>03</i> | 10.405<br>77821 | 6.1568<br>1037  | 3.8474<br>2502  | 4.2275<br>2431  | 7.0436<br>636   | 0.9586<br>645   | 0.4594<br>1472  | 0.9999<br>8262  |
| ENST0000<br>0440343 | <i>PPARA-0</i><br><i>02</i> | 0<br>0          | 0<br>0          | 0<br>0          | 0<br>0          | 0<br>0          | 0               | NA<br>NA        | NA<br>NA        |
| ENST0000<br>0496865 | <i>PPARA-0</i><br><i>10</i> | 34.339<br>06811 | 22.164<br>51733 | 22.122<br>69388 | 19.446<br>61181 | 26.413<br>7385  | 32.594<br>59284 | 0.9840<br>7133  | 0.9999<br>8262  |
| ENST0000<br>0484619 | <i>PPARA-0</i><br><i>07</i> | 5.2028<br>8911  | 0<br>0          | 4.8092<br>8128  | 0<br>0          | 0<br>0          | 10.545<br>30945 | 0.9821<br>9648  | 0.9999<br>8262  |
| ENST0000<br>0508254 | <i>TLR6-002</i>             | 0<br>0          | 44.329<br>03465 | 17.313<br>4126  | 8.4550<br>48613 | 7.9241<br>21549 | 14.379<br>96743 | 0.5062<br>20585 | 0.9999<br>82619 |
| ENST0000<br>0514655 | <i>TLR6-003</i>             | 88.449<br>11482 | 50.485<br>84502 | 202.95<br>16699 | 5.9185<br>34029 | 19.370<br>0749  | 29.718<br>59936 | 0.0023<br>60778 | 0.1464<br>57759 |
| ENST0000<br>0436693 | <i>TLR6-201</i>             | 3953.1<br>55143 | 3221.2<br>43185 | 2689.3<br>50091 | 5714.7<br>67358 | 6466.0<br>83184 | 6560.1<br>41142 | 8.24E-0<br>5    | 0.0119<br>19942 |
| ENST0000<br>0381950 | <i>TLR6-001</i>             | 514.04<br>54438 | 4361.4<br>84465 | 3498.2<br>71202 | 294.23<br>56917 | 353.94<br>40959 | 699.82<br>50817 | 0.0033<br>98385 | 0.1865<br>89606 |
| ENST0000<br>0483928 | <i>MAP2K3-007</i>           | 0<br>0          | 25.780<br>3813  | 15.422<br>5221  | 12.707<br>00861 | 36.174<br>02188 | 11.538<br>19082 | 0.6982<br>21361 | 0.9999<br>47878 |
| ENST0000<br>0496046 | <i>MAP2K3-004</i>           | 0<br>0          | 0<br>0          | 0<br>0          | 0<br>0          | 0<br>0          | 0               | NA<br>NA        | NA<br>NA        |
| ENST0000<br>0526076 | <i>MAP2K3-016</i>           | 0<br>0          | 0<br>0          | 0<br>0          | 0<br>0          | 0<br>0          | 0               | NA<br>NA        | NA<br>NA        |
| ENST0000<br>0361818 | <i>MAP2K3-201</i>           | 0<br>0          | 0<br>0          | 0<br>0          | 0<br>0          | 0<br>0          | 0               | NA<br>NA        | NA<br>NA        |
| ENST0000<br>0316920 | <i>MAP2K3-013</i>           | 0<br>0          | 0<br>0          | 0<br>0          | 5.9299<br>37349 | 3.5291<br>72867 | 0               | 0.2649<br>85751 | NA              |
| ENST0000<br>0395491 | <i>MAP2K3-002</i>           | 2733.4<br>6814  | 200.10<br>48644 | 3350.5<br>42927 | 88.949<br>06024 | 56.466<br>76587 | 3452.8<br>03602 | 0.6332<br>74201 | 0.9999<br>47878 |
| ENST0000<br>0342679 | <i>MAP2K3-001</i>           | 510.96<br>74486 | 3185.7<br>18547 | 345.07<br>89321 | 4043.3<br>70138 | 4075.3<br>12368 | 458.64<br>3085  | 0.3686<br>18072 | 0.9999<br>47878 |

| transcript_<br>id   | transcript<br>_name | Contro<br>I1    | Contro<br>I2    | Contro<br>I3    | Tm1             | Tm2             | Tm3             | pvalue          | padj            |
|---------------------|---------------------|-----------------|-----------------|-----------------|-----------------|-----------------|-----------------|-----------------|-----------------|
| ENST0000<br>0583508 | MAP2K3-<br>017      | 104.89<br>37242 | 14.731<br>64646 | 234.22<br>95545 | 73.700<br>64991 | 15.881<br>2779  | 0               | 0.2668<br>77176 | 0.9999<br>47878 |
| ENST0000<br>0479129 | MAP2K3-<br>006      | 1.0385<br>51725 | 0               | 41.448<br>02816 | 166.88<br>53797 | 0               | 24.999<br>41344 | 0.4120<br>20888 | 0.9999<br>47878 |
| ENST0000<br>0529517 | MAP2K3-<br>011      | 17.655<br>37932 | 11.048<br>73484 | 7.7112<br>61052 | 0               | 0               | 11.538<br>19082 | 0.3925<br>64918 | 0.9999<br>47878 |
| ENST0000<br>0477540 | MAP2K3-<br>009      | 140.20<br>44828 | 52.788<br>39981 | 84.823<br>87158 | 212.63<br>06107 | 63.525<br>1116  | 80.767<br>33573 | 0.6173<br>52873 | 0.9999<br>47878 |
| ENST0000<br>0534743 | MAP2K3-<br>010      | 24.925<br>24139 | 12.276<br>37205 | 26.025<br>50605 | 52.522<br>30223 | 39.703<br>19475 | 29.806<br>99295 | 0.0662<br>70357 | 0.8523<br>10358 |
| ENST0000<br>0527123 | MAP2K3-<br>014      | 22.848<br>13795 | 18.414<br>55807 | 11.566<br>89158 | 16.095<br>54423 | 37.938<br>60832 | 18.268<br>80213 | 0.4595<br>34279 | 0.9999<br>47878 |
| ENST0000<br>0596822 | IRF3-017            | 0               | 44.194<br>93938 | 0               | 65.229<br>31084 | 54.702<br>17943 | 48.075<br>79508 | 0.3723<br>83814 | 0.9999<br>47878 |
| ENST0000<br>0598108 | IRF3-028            | 0               | 0               | 0               | 0               | 0               | 0               | NA              | NA              |
| ENST0000<br>0595034 | IRF3-023            | 0               | 0               | 0               | 0               | 0               | 0               | NA              | NA              |
| ENST0000<br>0593337 | IRF3-027            | 0               | 0               | 0               | 0               | 10.587<br>5186  | 0               | 0.2893<br>32567 | NA              |
| ENST0000<br>0598808 | IRF3-010            | 638.70<br>93107 | 2032.9<br>67211 | 374.96<br>00687 | 241.43<br>31635 | 2105.1<br>51615 | 294.22<br>38659 | 0.8576<br>26689 | 0.9999<br>47878 |
| ENST0000<br>0377139 | IRF3-001            | 341.68<br>35175 | 55.243<br>67422 | 252.54<br>37995 | 160.95<br>54423 | 96.169<br>96062 | 472.10<br>43076 | 0.8630<br>52384 | 0.9999<br>47878 |
| ENST0000<br>0601291 | IRF3-002            | 219.13<br>44139 | 94.528<br>06478 | 138.80<br>26989 | 462.53<br>51132 | 0               | 360.56<br>84631 | 0.6360<br>23397 | 0.9999<br>47878 |
| ENST0000<br>0593922 | IRF3-011            | 96.585<br>3104  | 14.731<br>64646 | 0               | 154.17<br>83711 | 127.93<br>25164 | 343.26<br>11768 | 0.1344<br>48832 | 0.9768<br>72822 |
| ENST0000<br>0597198 | IRF3-004            | 2.0771<br>0345  | 0               | 0               | 6.7770<br>71256 | 0               | 0               | 0.6625<br>73211 | NA              |
| ENST0000<br>0597636 | IRF3-003            | 894.19<br>3035  | 310.59<br>22129 | 598.58<br>66392 | 881.86<br>63972 | 161.45<br>96587 | 798.05<br>81983 | 0.9711<br>15948 | 0.9999<br>47878 |
| ENST0000<br>0599223 | IRF3-005            | 244.05<br>96553 | 0               | 158.08<br>08516 | 279.55<br>41893 | 0               | 179.80<br>34736 | 0.9408<br>69351 | 0.9999<br>47878 |
| ENST0000<br>0309877 | IRF3-006            | 252.36<br>80691 | 29.463<br>29292 | 169.64<br>77432 | 219.40<br>76819 | 34.409<br>43545 | 418.25<br>94172 | 0.6175<br>24806 | 0.9999<br>47878 |
| ENST0000<br>0596756 | IRF3-025            | 10.385<br>51725 | 0               | 0               | 16.095<br>54423 | 0               | 0               | 0.8668<br>62799 | 0.9999<br>47878 |
| ENST0000<br>0600022 | IRF3-012            | 119.43<br>34483 | 0               | 149.40<br>56829 | 91.490<br>46196 | 0               | 219.22<br>56255 | 0.9341<br>58483 | 0.9999<br>47878 |
| ENST0000<br>0599144 | IRF3-009            | 147.47<br>43449 | 73.658<br>2323  | 31.808<br>95184 | 501.50<br>32729 | 0               | 0               | 0.7176<br>27621 | 0.9999<br>47878 |

| transcript_<br>id   | transcript<br>_name | Contro<br>I1    | Contro<br>I2    | Contro<br>I3    | Tm1             | Tm2             | Tm3             | pvalue          | padj            |
|---------------------|---------------------|-----------------|-----------------|-----------------|-----------------|-----------------|-----------------|-----------------|-----------------|
| ENST0000<br>0377135 | <i>IRF3-201</i>     | 45.696<br>27589 | 0               | 17.350<br>33737 | 104.19<br>74706 | 0               | 72.113<br>69261 | 0.5261<br>32551 | 0.9999<br>47878 |
| ENST0000<br>0600911 | <i>IRF3-007</i>     | 76.852<br>82763 | 45.422<br>57658 | 0               | 165.19<br>11119 | 0               | 0               | 0.8986<br>83083 | 0.9999<br>47878 |
| ENST0000<br>0593818 | <i>IRF3-022</i>     | 13.501<br>17242 | 0               | 17.350<br>33737 | 0               | 28.233<br>38293 | 0               | 0.9660<br>59713 | 0.9999<br>47878 |
| ENST0000<br>0601373 | <i>IRF3-024</i>     | 25.963<br>79312 | 33.146<br>20453 | 254.47<br>16147 | 91.490<br>46196 | 23.821<br>91685 | 67.306<br>11311 | 0.4859<br>02207 | 0.9999<br>47878 |
| ENST0000<br>0601809 | <i>IRF3-019</i>     | 24.925<br>24139 | 46.650<br>21379 | 28.917<br>22895 | 33.885<br>35628 | 37.938<br>60832 | 44.229<br>73147 | 0.6092<br>86321 | 0.9999<br>47878 |
| ENST0000<br>0596765 | <i>IRF3-008</i>     | 16.616<br>8276  | 0               | 10.602<br>98395 | 74.547<br>78382 | 0               | 0               | 0.6473<br>12123 | 0.9999<br>47878 |
| ENST0000<br>0594387 | <i>IRF3-013</i>     | 127.74<br>18621 | 119.08<br>08089 | 113.74<br>11005 | 155.02<br>5505  | 175.57<br>63501 | 153.84<br>25442 | 0.0343<br>33565 | 0.6721<br>67551 |
| ENST0000<br>0595240 | <i>IRF3-016</i>     | 8.3084<br>13798 | 8.5934<br>60435 | 8.6751<br>68684 | 18.636<br>94595 | 26.468<br>7965  | 12.499<br>70672 | 0.0403<br>89643 | 0.7172<br>1687  |
| ENST0000<br>0596788 | <i>IRF3-026</i>     | 3.1156<br>55174 | 3.6829<br>11615 | 8.6751<br>68684 | 7.6242<br>05163 | 6.1760<br>52517 | 5.7690<br>95409 | 0.6777<br>00892 | 0.9999<br>47878 |
| ENST0000<br>0442265 | <i>IRF3-202</i>     | 41.542<br>06899 | 0               | 3.8556<br>30526 | 0               | 0               | 0               | 0.0570<br>26029 | 0.8125<br>91336 |
| ENST0000<br>0600453 | <i>IRF3-020</i>     | 39.464<br>96554 | 25.780<br>3813  | 54.942<br>735   | 0               | 0               | 0               | 1.04E-0<br>8    | 4.31E-0<br>6    |
| ENST0000<br>0599680 | <i>IRF3-021</i>     | 24.925<br>24139 | 19.642<br>19528 | 0.9639<br>07632 | 1.6942<br>67814 | 30.880<br>26258 | 19.230<br>31803 | 0.8939<br>60369 | 0.9999<br>47878 |
| ENST0000<br>0597180 | <i>IRF3-029</i>     | 6.2313<br>10349 | 14.731<br>64646 | 15.422<br>5221  | 20.331<br>21377 | 10.587<br>5186  | 20.191<br>83393 | 0.4377<br>51422 | 0.9999<br>47878 |
| ENST0000<br>0597369 | <i>IRF3-014</i>     | 207.71<br>0345  | 114.17<br>02601 | 181.21<br>46347 | 132.15<br>28895 | 132.34<br>39825 | 112.49<br>73605 | 0.2352<br>94529 | 0.9999<br>47878 |
| ENST0000<br>0602190 | <i>IRF3-018</i>     | 12.462<br>6207  | 17.186<br>92087 | 0.9639<br>07632 | 17.789<br>81205 | 15.881<br>2779  | 28.845<br>47705 | 0.3000<br>13039 | 0.9999<br>47878 |
| ENST0000<br>0596644 | <i>IRF3-015</i>     | 11.424<br>06897 | 14.731<br>64646 | 17.350<br>33737 | 30.496<br>82065 | 0.8822<br>93217 | 24.037<br>89754 | 0.7638<br>81833 | 0.9999<br>47878 |



Supplementary Table 3. RT-qPCR primers sequences for the study.

|                                |         |                         |
|--------------------------------|---------|-------------------------|
| <i>TNF-<math>\alpha</math></i> | Forward | GAGGCCAAGCCCTGGTATG     |
|                                | Reverse | CGGGCCGATTGATCTCAGC     |
| <i>IL-1<math>\beta</math></i>  | Forward | ATGATGGCTTATTACAGTGGCAA |
|                                | Reverse | GTCGGAGATTCGTAGCTGGA    |
| <i>TUT1</i>                    | Forward | TCACTTCCTATCGGATCGGC    |
|                                | Reverse | CTGTACCGACAAAACACAAGC   |
| <i>JunB</i>                    | Forward | ACGACTCATACACAGCTACGG   |
|                                | Reverse | GCTCGGTTTCAGGAGTTTGTAGT |

Supplementary Table 4. RT-qPCR primers sequences for *NCOR2-013*.

|                                                  |         |                         |
|--------------------------------------------------|---------|-------------------------|
| <b><i>NCOR2-013</i></b><br><b>-exon 10 to 11</b> | Forward | TGCTCTGCTCTGTACCAGGTCTC |
|                                                  | Reverse | ACAAAACCAACCACCACGTCCTC |
| <b><i>NCOR2-013</i></b><br><b>-exon 12</b>       | Forward | AGGTAGGCAAGGCGGTCCATG   |
|                                                  | Reverse | GCATCATCGACCTGTCCCAAGTG |

Supplementary Table 5. ChIP-qPCR primers sequences for the study.

|                                                                |         |                           |
|----------------------------------------------------------------|---------|---------------------------|
| <i>TNF-<math>\alpha</math>-1</i><br>(chr6: 31574664-31574737)  | Forward | GTCCAGGGCTATGGAAGTCG      |
|                                                                | Reverse | GGTCCTGGAGGCTCTTTCAC      |
| <i>TNF-<math>\alpha</math>-2</i><br>(chr6: 31575099-31575278)  | Forward | CAACCCCGTTTTCTCTCCCTCAAG  |
|                                                                | Reverse | GGCCACTGACTGATTTGTGTGTAGG |
| <i>TNF-<math>\alpha</math>-3</i><br>(chr6: 31575339-31575412)  | Forward | GGGAGTGTGAGGGGTATCCT      |
|                                                                | Reverse | CTGCACCTTCTGTCTCGGTT      |
| <i>IL-1<math>\beta</math>-1</i><br>(chr2: 112836446-112836756) | Forward | CTGGAGCAGAGGCTTTGACA      |
|                                                                | Reverse | AACCTCTTCGAGGCACAAGG      |
| <i>IL-1<math>\beta</math>-2</i><br>(chr2: 112837433-112837605) | Forward | CAGGTGCTGTTACCCTAGCC      |
|                                                                | Reverse | ACTTTGCTGGTGTCTCGGTT      |
| <i>IL-1<math>\beta</math>-3</i><br>(chr2: 112838165-112838491) | Forward | GTTTGCTGCTTGAATGGGTGAATGG |
|                                                                | Reverse | AGGAGGGCTCAGTGTTAGGAATGG  |
