# Supplementary material for: Talaromyces marneffei suppresses macrophage inflammation by regulating host alternative splicing
Source: PubMed Central journal article supplement (PMC10579421; doi:10.1038/s42003-023-05409-6), 2023-10-16
Supplement: 42003_2023_5409_MOESM2_ESM.pdf [file 42003_2023_5409_MOESM2_ESM.pdf]

## **Description of Additional Supplementary Files**

**File name:** Supplementary Data 1

**Description:** Source data underlying the graphs and charts presented in the main figures.
